# Supplementary material for: Emerging investigator series: a machine learning approach to quantify the impact of meteorology on tropospheric ozone in the inland southern California
Source: Royal Society of Chemistry journal article supplement (doi:10.1039/d2ea00077f), 2023-01-01
Supplement: d2ea00077f1.pdf [file d2ea00077f1.pdf]

1  
2  
3 **Supplemental Information for:**

4 **A Machine Learning Approach to Quantify the Impact of Meteorology on Tropospheric Ozone**  
5 **in the Inland Empire, CA**

6 Khanh Do<sup>1,2</sup>, Manasi Mahish<sup>3</sup>, Arash Kashfi Yeganeh<sup>1,2</sup>, Ziqi Gao<sup>4</sup>, Charles L. Blanchard<sup>5</sup>, and  
7 Cesunica E. Ivey<sup>1,2,6\*</sup>

8 \*Corresponding Author: [iveyc@berkeley.edu](mailto:iveyc@berkeley.edu)

9 <sup>1</sup>Department of Chemical and Environmental Engineering, University of California Riverside, Riverside, CA, USA

10 <sup>2</sup>Center for Environmental Research and Technology, Riverside, CA, USA

11 <sup>3</sup>Kenna, Mississauga, Ontario, Canada

12 <sup>4</sup>Department of Civil and Environmental Engineering, Georgia Institute of Technology, Atlanta, GA, USA

13 <sup>5</sup>Envair, Albany, CA, USA

14 <sup>6</sup>Now at Department of Civil and Environmental Engineering, University of California, Berkeley, Berkeley, CA, USA

15

16

17

18

19

20

21

21 **Figures**

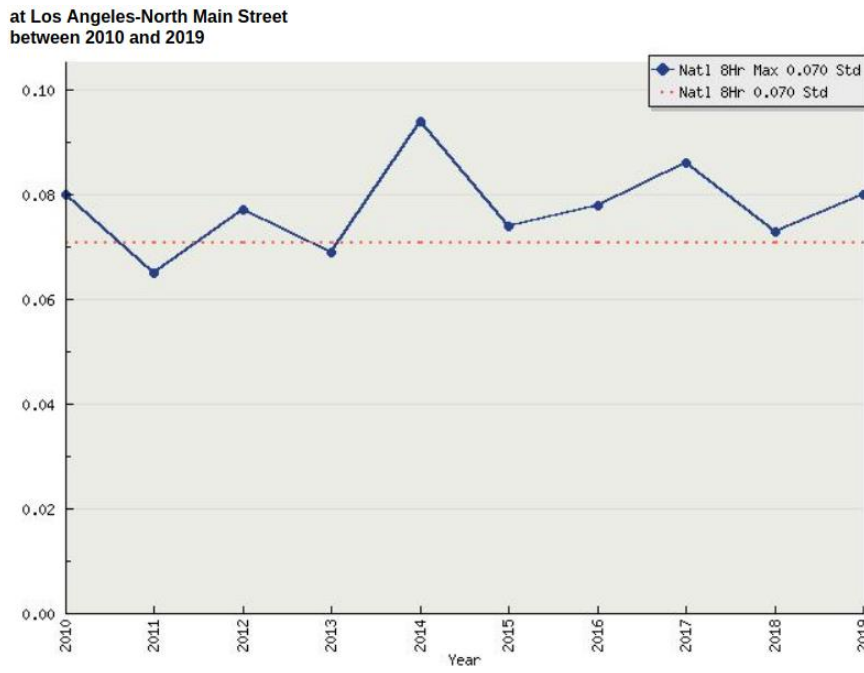

22

23 *Figure S1. 8-hour ozone design value concentrations in Los Angeles. The red dash line is the*  
24 *National Ambient Air Quality Standard (NAAQS) for 8-hour ozone (0.070 ppm, 2015). Source:*  
25 *California Air Resources Board*

26

at Fontana-Arrow Highway  
between 2010 and 2019

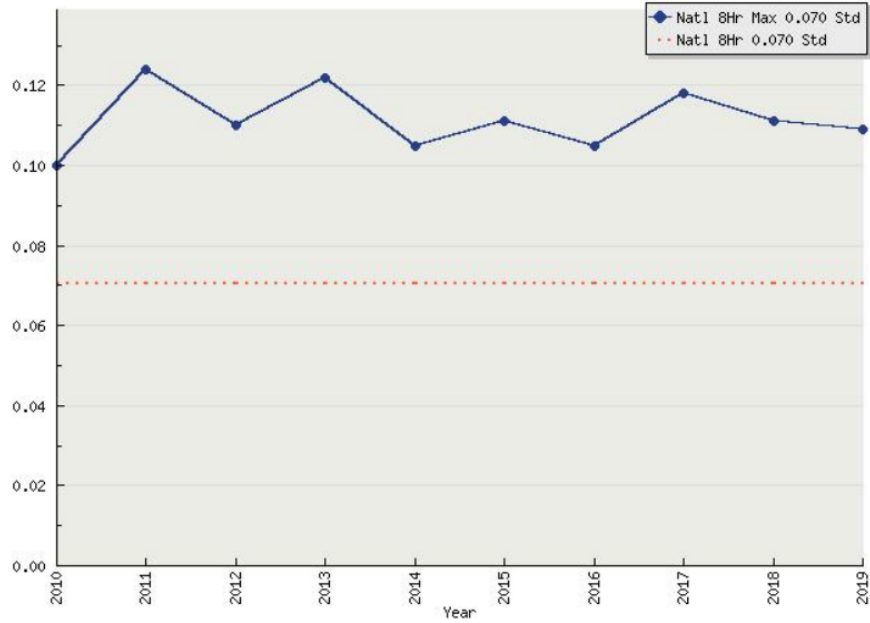

27

28 *Figure S2. 8-hour ozone design value concentrations in Fontana. The red dash line is the*  
29 *National Ambient Air Quality Standard (NAAQS) for 8-hour ozone (0.070 ppm, 2015). Source:*  
30 *California Air Resources Board*

31

32

33

34

35

36

37

38

39

40

41

42

43

44

45

46  
47  
48  
49  
50  
51  
52  
53  
54  
55  
56  
57  
58  
59  
60  
61  
62  
63  
64  
65  
66  
67  
68

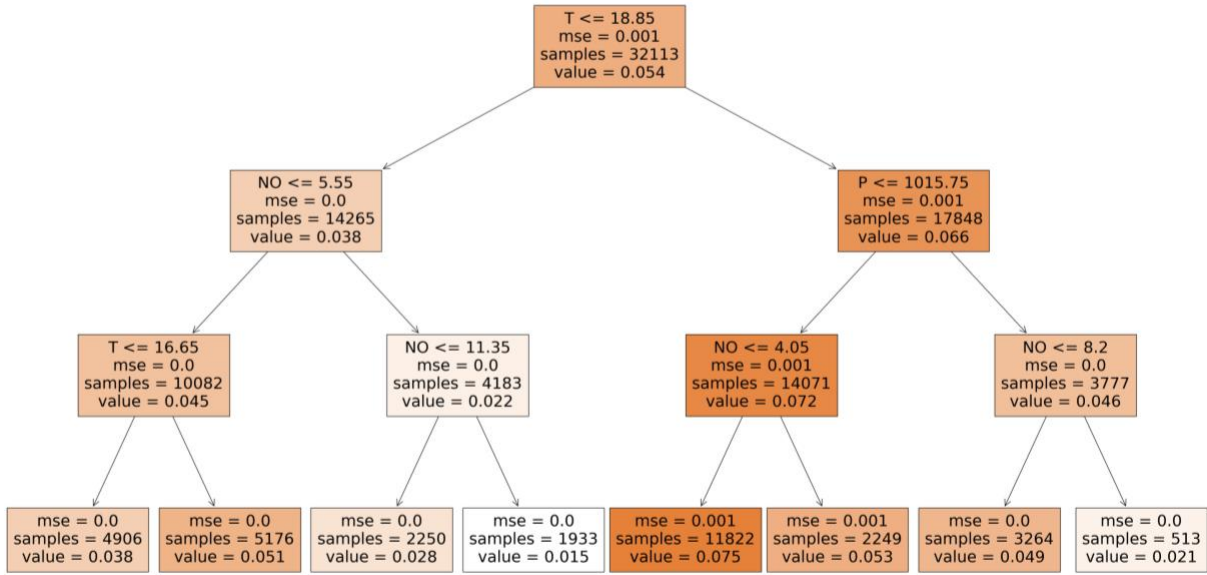

Figure S3. Three node decision trees based on air quality and meteorological input from 2014-2018. The meteorology data is from LAX, and air quality data is from Fontana. The predictions were made based on 12:00 noon to 5:00 PM training data.

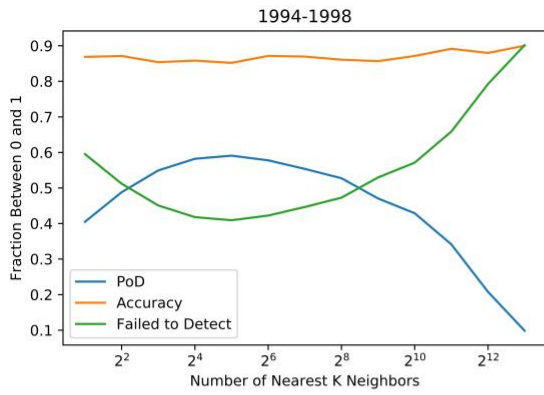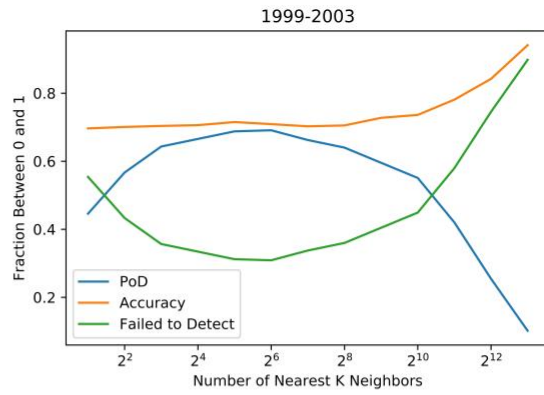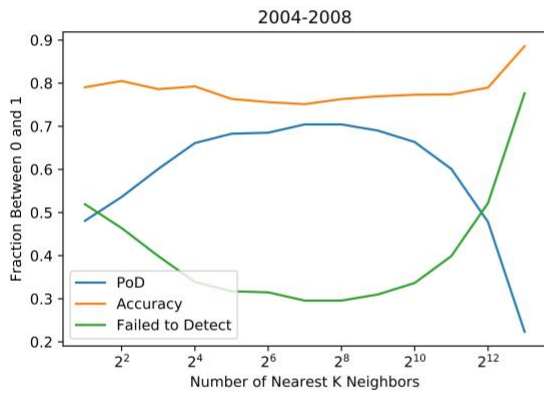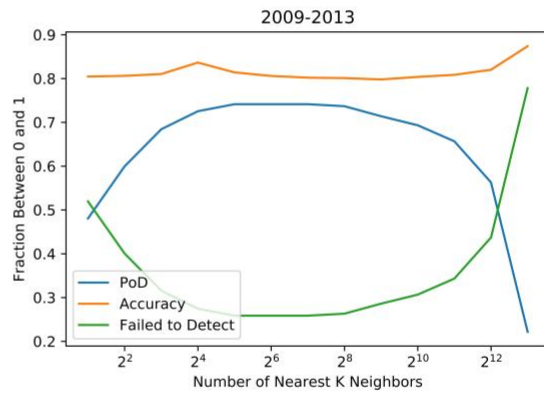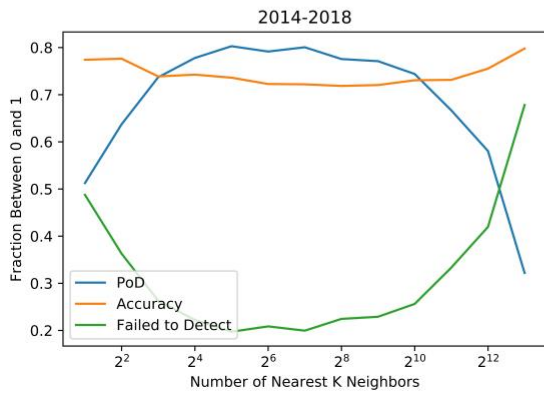

69

70

71 *Figure S4. Testing the performance of K-NN by varying the number of nearest neighbors while*  
 72 *keeping other parameters constant.*

73

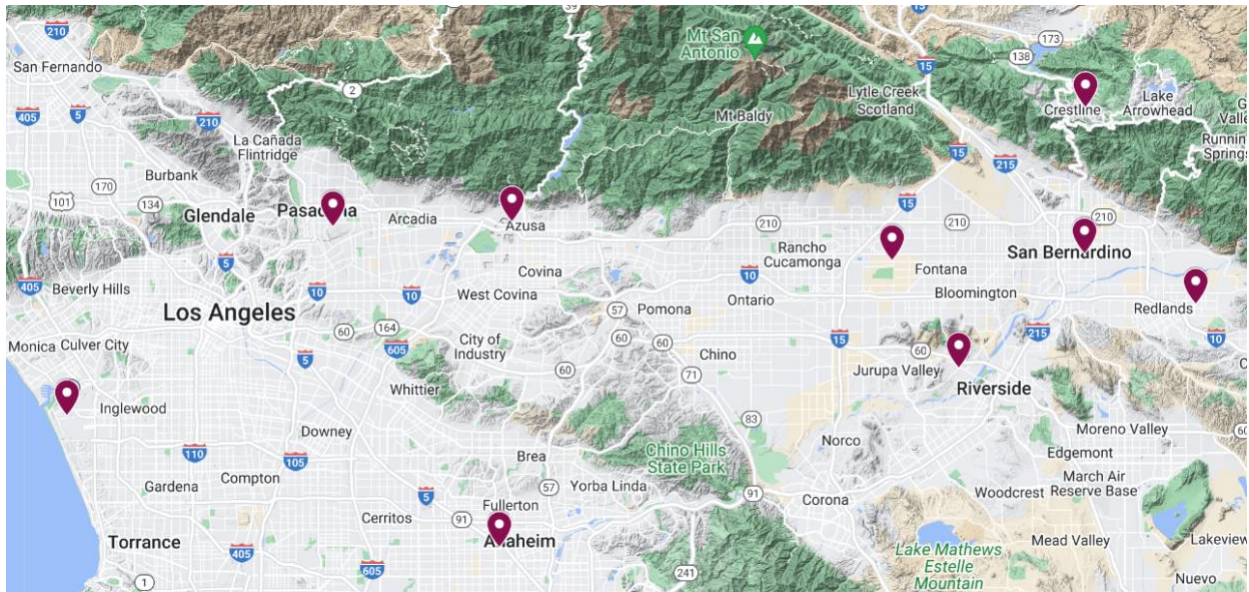

74

75 *Figure S5. Nine evaluation sites from SCAQMD. From left to right, LAX, Pasadena, Anaheim, Azusa,*  
 76 *Fontana, Riverside, San Bernardino, Crestline, and Redlands.*

77

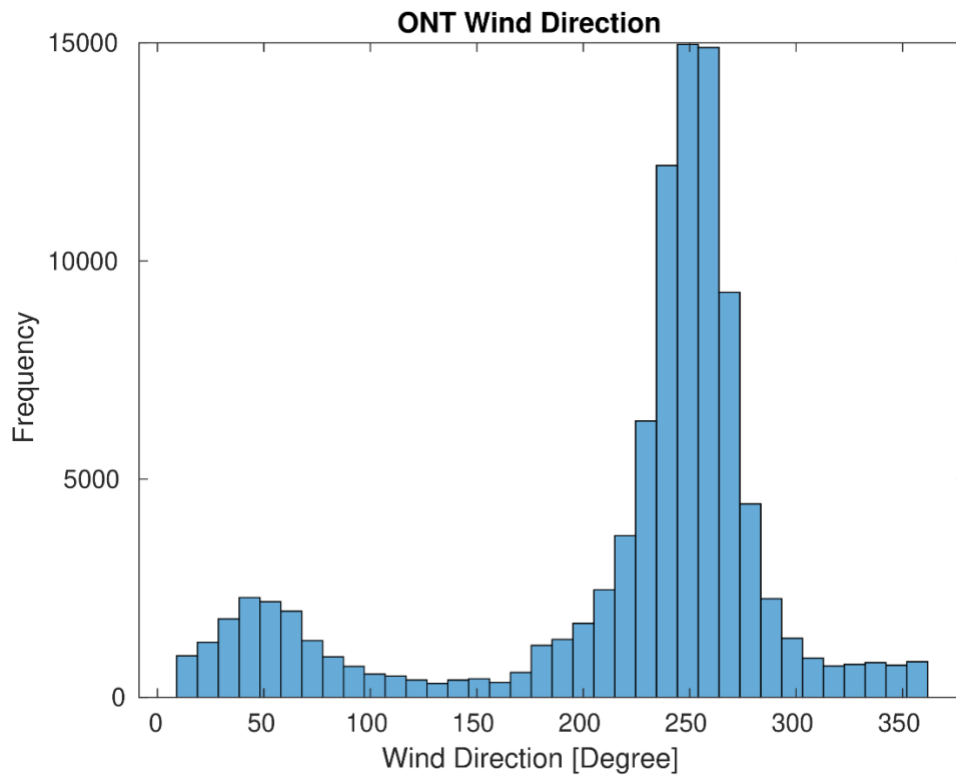

78

79 *Figure S6. Wind direction in Ontario international airport. 25% of wind directions are from 254-*  
 80 *273 degrees, and 64% of wind directions are from 225-273 degrees.*

81

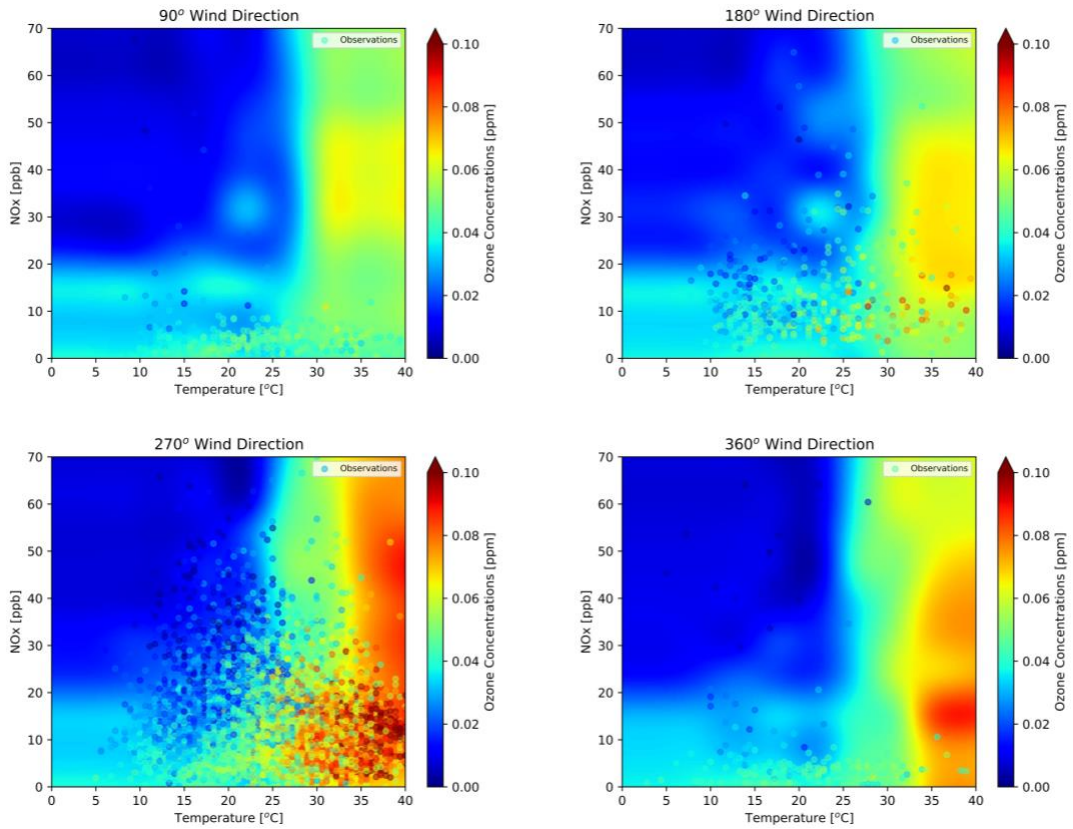

82

83 *Figure S7. Contour plots generated by the RFR model trained on ONT meteorology and Fontana*  
 84 *air quality at constant wind speed (9 m/s), visibility (16000 m), dynamic pressure, dynamic relative*  
 85 *humidity, and at four discrete wind direction levels (90, 180, 270, 360). The dots are observational*  
 86 *data plotted on the top of the contours.*

87

88

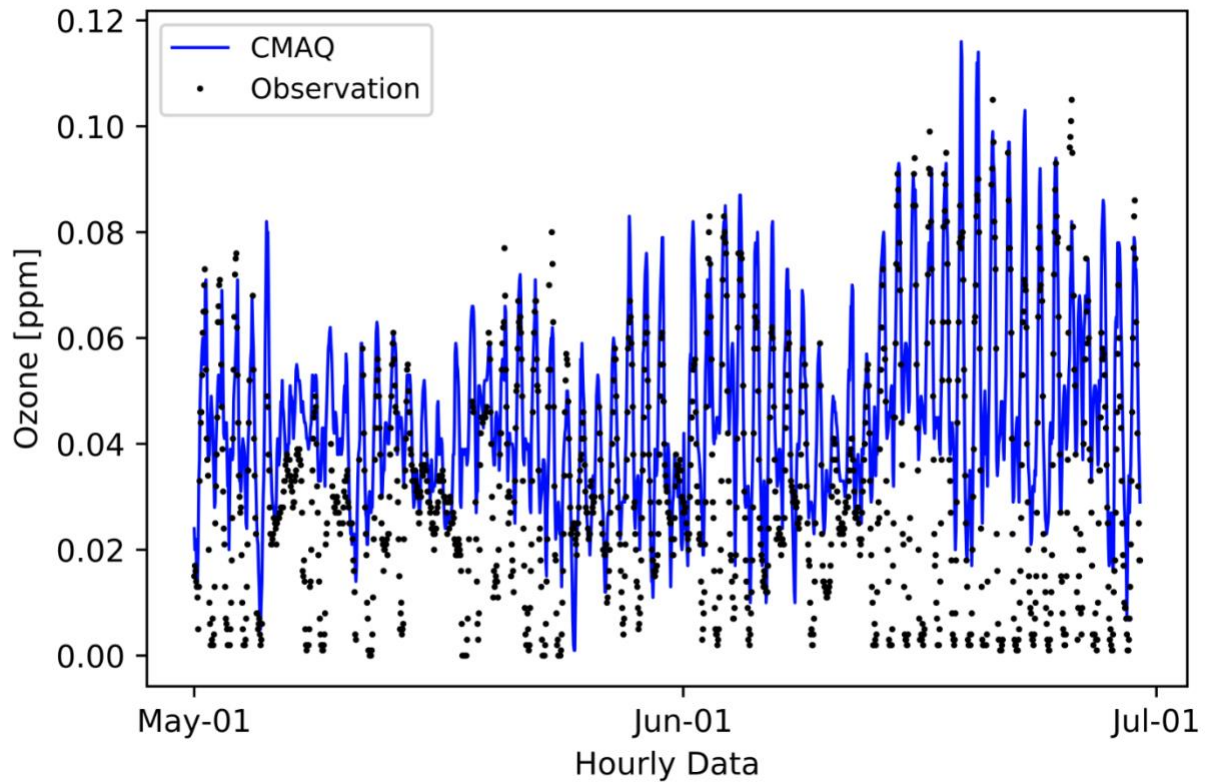

89

90 *Figure S8. Time series of ozone concentration in Fontana, CA. The blue line is CMAQ simulation*  
 91 *results, and the dots are observational data.*

92

93

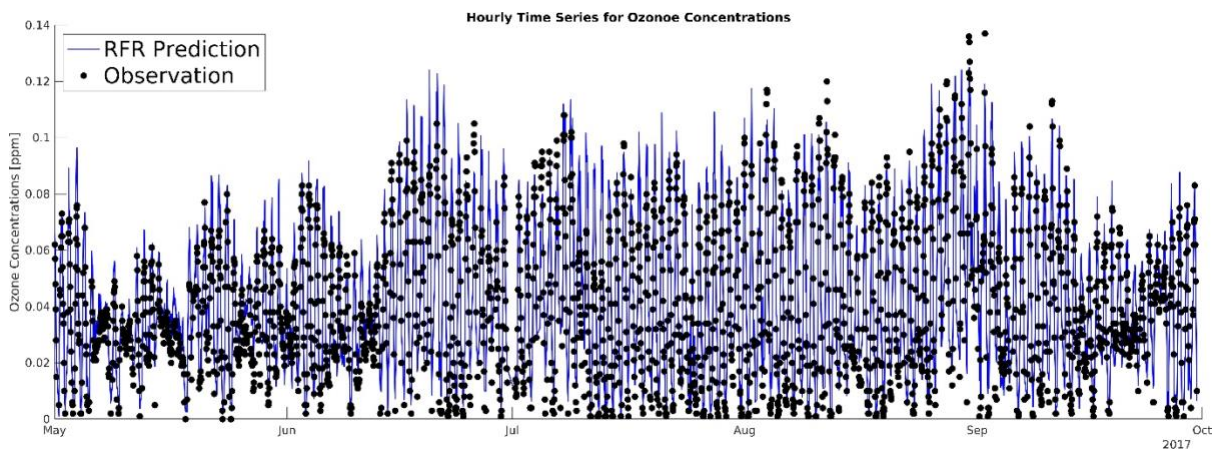

94

95 *Figure S9. Time series of ozone concentration in Fontana, CA. The blue line is RFR prediction*  
 96 *results, and the dots are observational data.*

97

98



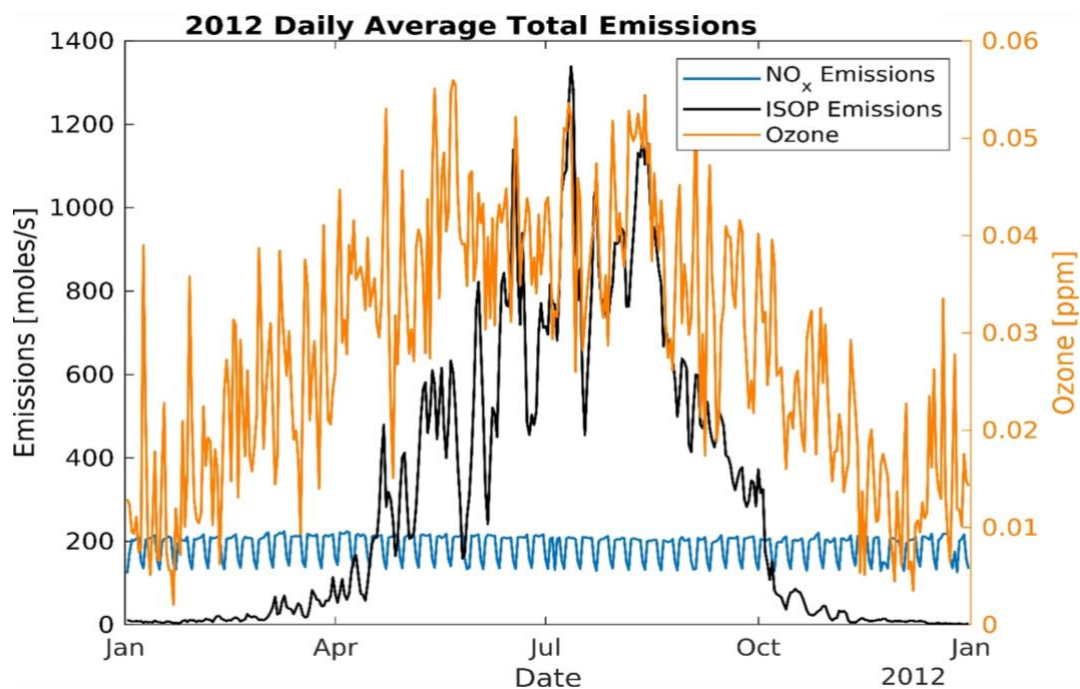

99

100 *Figure S10. Daily average NO<sub>x</sub> and isoprene (ISOP) emissions over the third model domain. The*  
 101 *periodical oscillation of NO<sub>x</sub> emissions (blue line) is due to weekday/weekend behavior. The black*  
 102 *line is the total biogenic isoprene emissions of the domain. NO<sub>x</sub> and ISOP emissions were extracted*  
 103 *from gridded SCAQMD emissions. Twenty-four-hour ozone average is sampled from Fontana*  
 104 *monitoring station.*

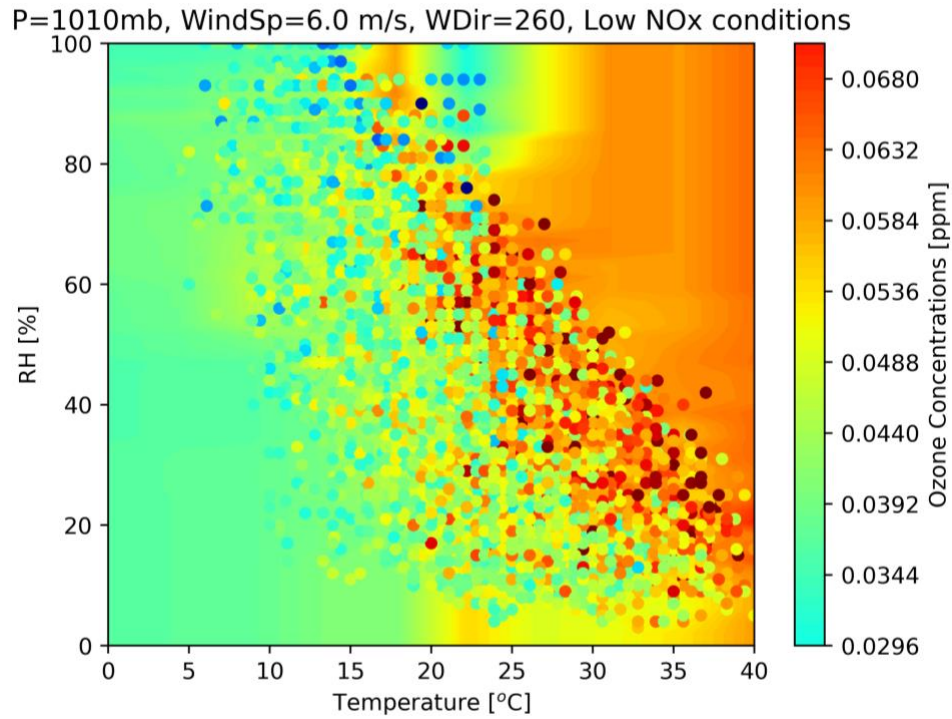

105

106 *Figure S11. Contour plots generated by the RFR model trained on ONT meteorology and Fontana*  
107 *air quality at constant wind speed (6.0 m/s), visibility (16000 m), wind direction from 260 degree,*  
108 *and 1010 mb pressure. The dots are observational data plotted on the top of the contours.*

109

110

111

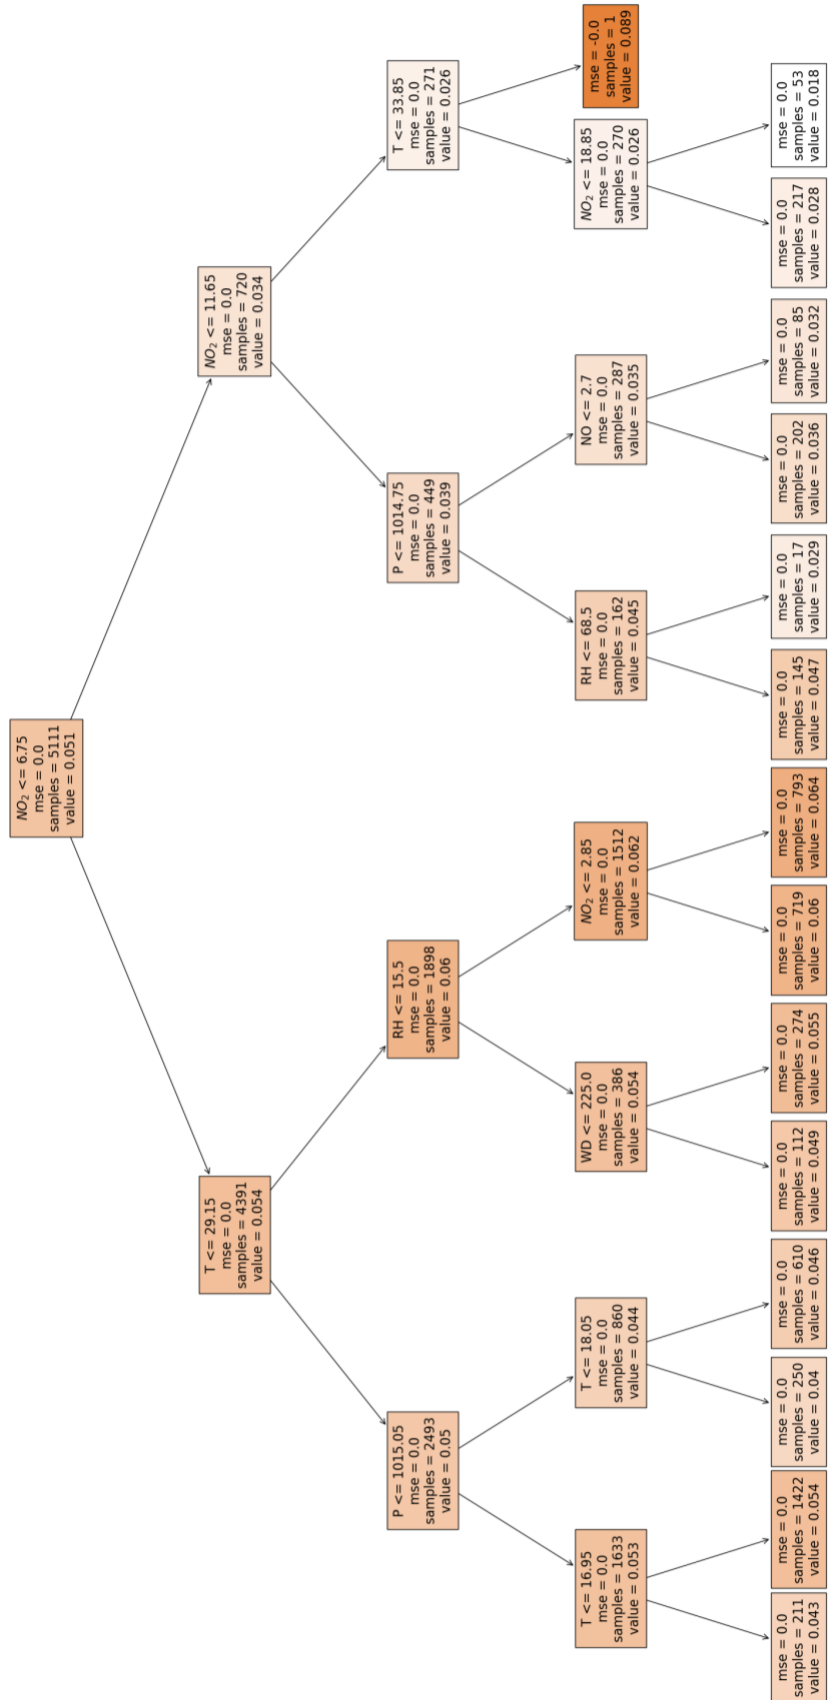

Figure S12. Four node decision trees based on air quality and meteorological input from 2014-2018. The meteorology data is from ONT, and air quality data is from Fontana. The predictions were made based on 12:00 noon to 5:00 PM training data.

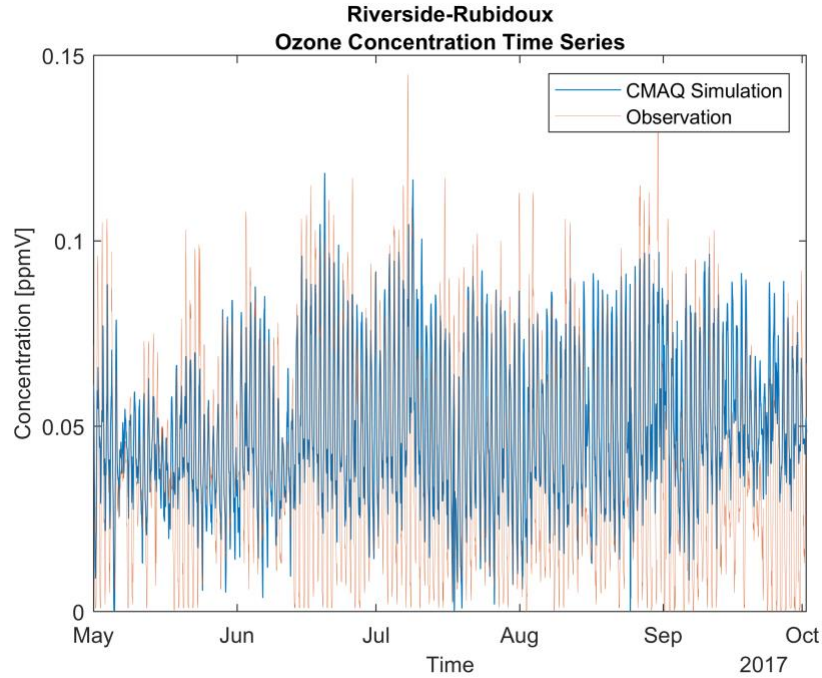

127

128 *Figure S13. Riverside – Rubidoux ozone concentration time series with hourly resolution. The blue*  
 129 *line is ozone concentration from CMAQ simulations, and orange line is observation ozone*  
 130 *concentration.*

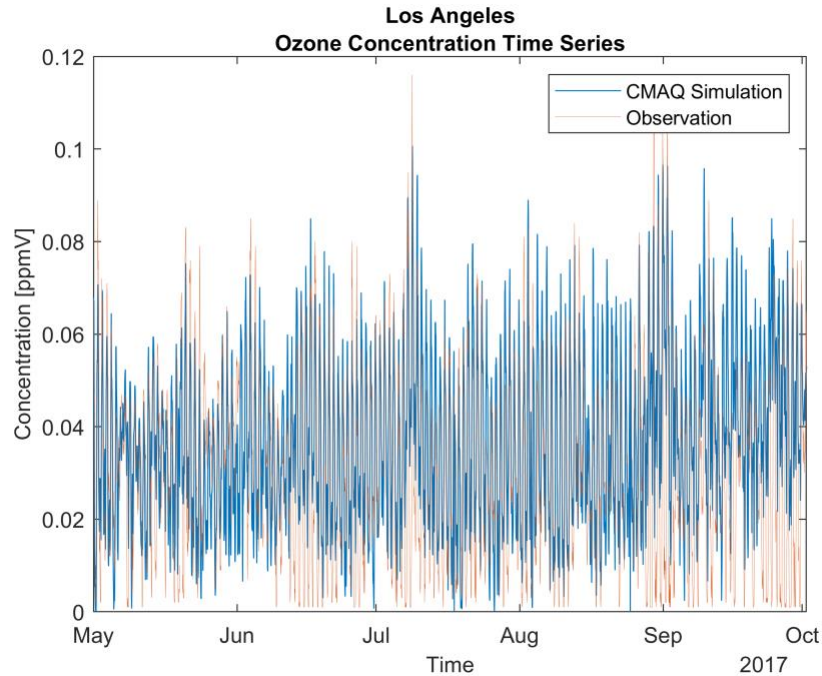

131

132 *Figure S14. Los Angeles ozone concentration time series with hourly resolution. The blue line is*  
 133 *ozone concentration from CMAQ simulations, and orange line is observation ozone concentration.*

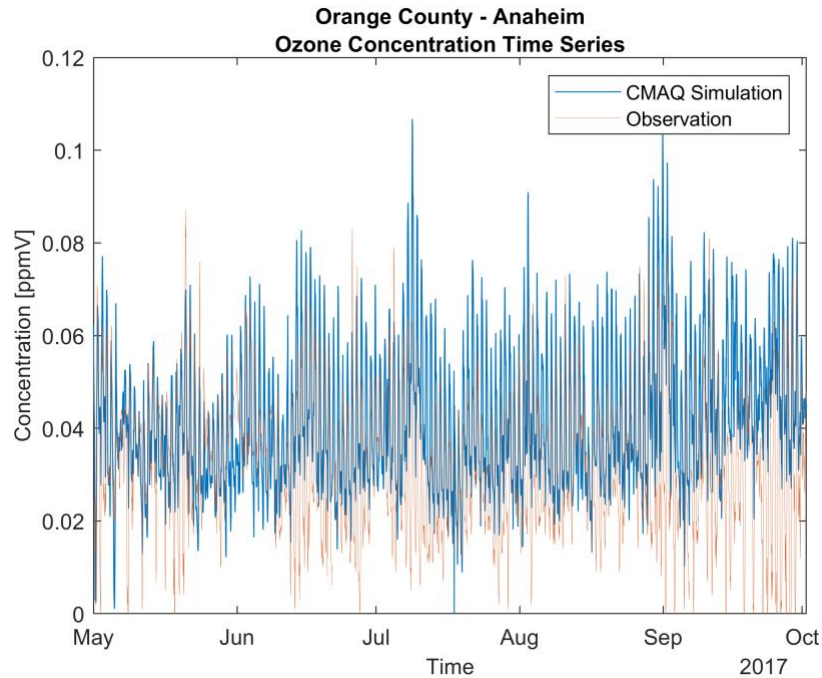

134

135 *Figure S15. Orange County-Anaheim ozone concentration time series with hourly resolution. The*  
 136 *blue line is ozone concentration from CMAQ simulations, and orange line is observation ozone*  
 137 *concentration.*

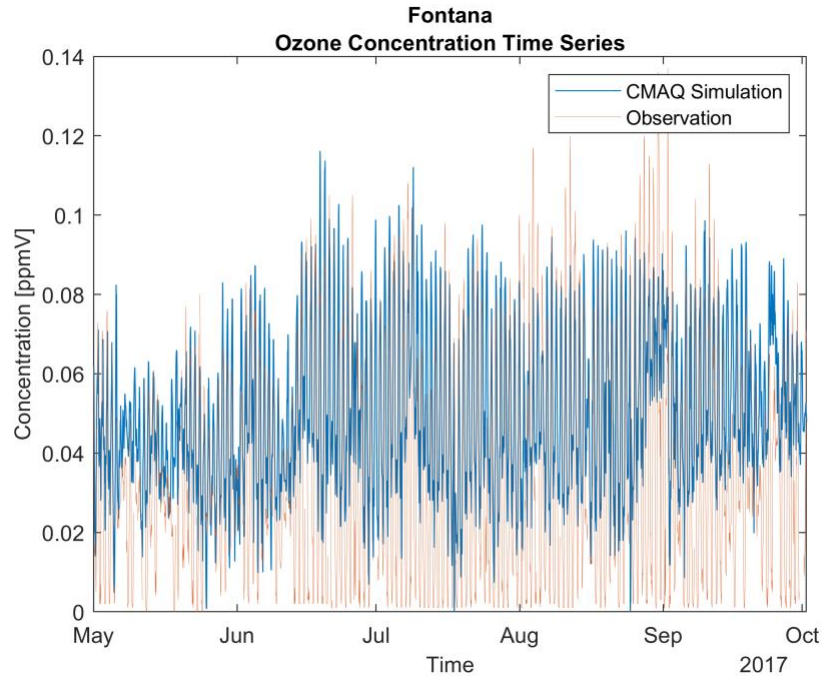

138

139 *Figure S16. Fontana ozone concentration time series with hourly resolution. The blue line is ozone*  
 140 *concentration from CMAQ simulations, and orange line is observation ozone concentration.*

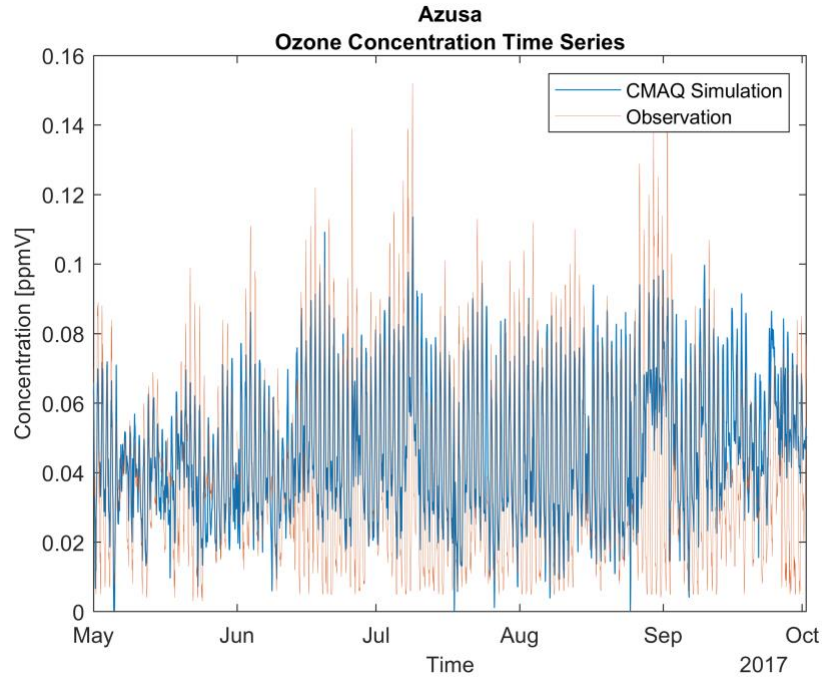

141

142 *Figure S17. Azusa ozone concentration time series with hourly resolution. The blue line is ozone*  
 143 *concentration from CMAQ simulations, and orange line is observation ozone concentration.*

144

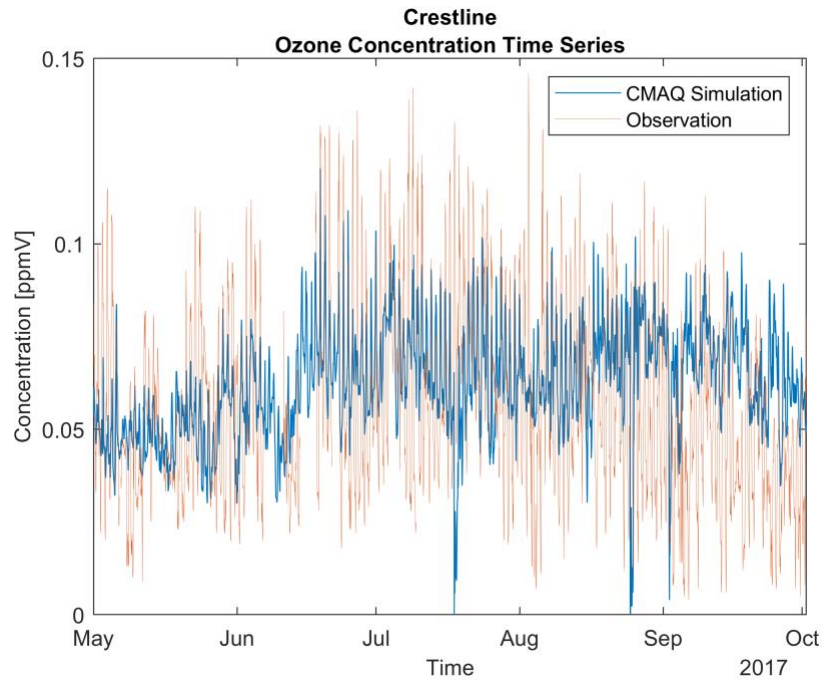

145

146 *Figure S18. Crestline ozone concentration time series with hourly resolution. The blue line is ozone*  
 147 *concentration from CMAQ simulations, and orange line is observation ozone concentration.*

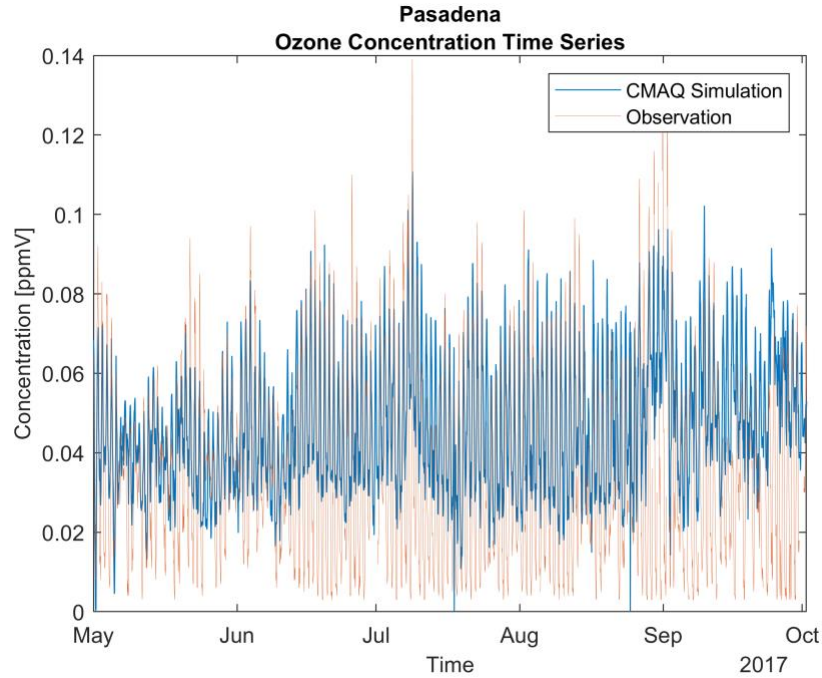

148

149 *Figure S19. Pasadena ozone concentration time series with hourly resolution. The blue line is*  
 150 *ozone concentration from CMAQ simulations, and orange line is observation ozone concentration.*

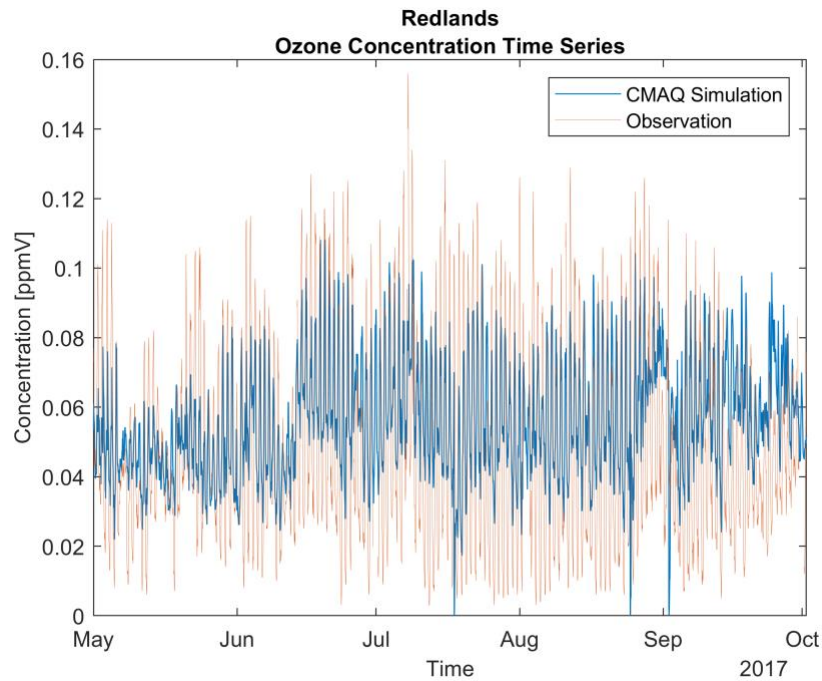

151

152 *Figure S20. Redlands ozone concentration time series with hourly resolution. The blue line is ozone*  
 153 *concentration from CMAQ simulations, and orange line is observation ozone concentration.*

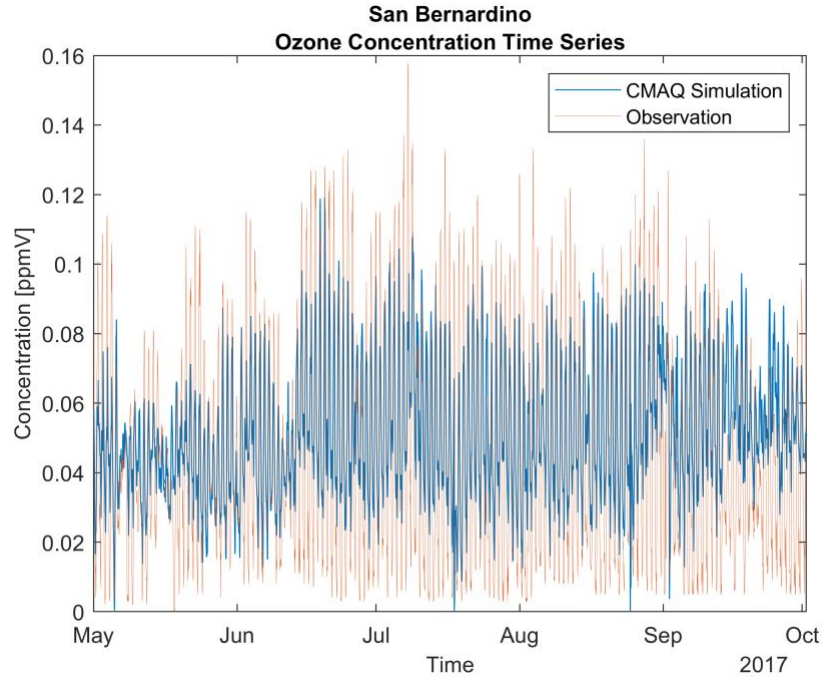

154

155 *Figure S21. San Bernardino ozone concentration time series with hourly resolution. The blue line*  
 156 *is ozone concentration from CMAQ simulations, and orange line is observation ozone*  
 157 *concentration.*

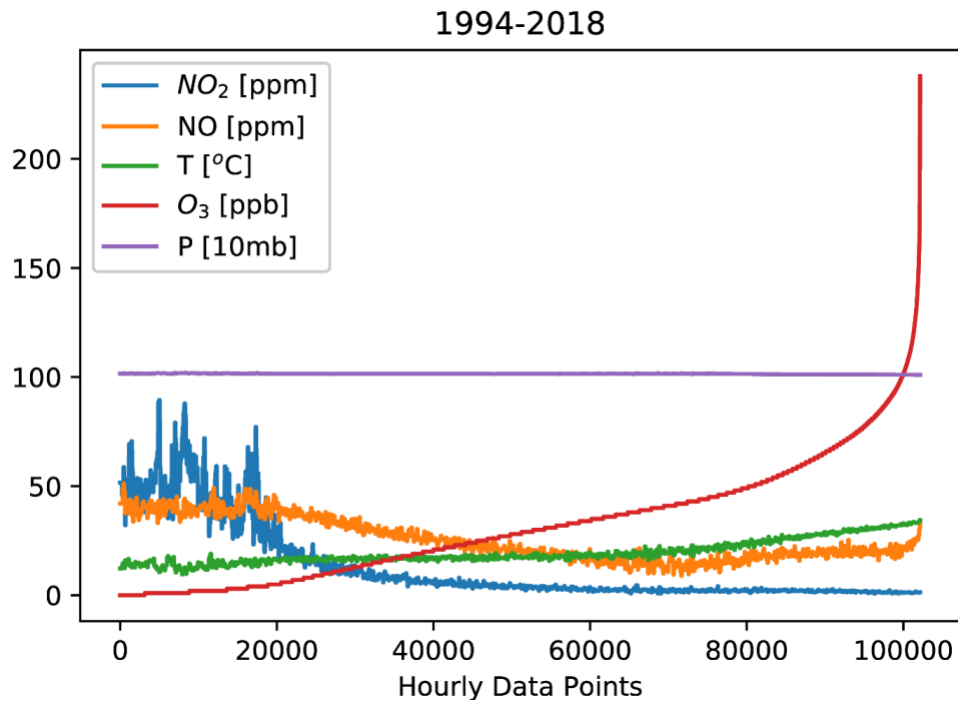

158

159 *Figure S22. More than one hundred thousand hourly data from 1994 to 2018 for  $NO_2$  (blue), NO*  
 160 *(orange), temperature (green), ozone (red), and pressure (purple) were sorted in ascending order.*

161



162 **Tables**

163 *Table set S1. Wilcoxon tests for no drop feature, one drop features, two drop features, and three*  
 164 *drop features. RFR model was trained on nine features (visibility, NO<sub>2</sub> (no2), NO (no), relative*  
 165 *humidity (RH), wind speed (windSP), wind direction (windDir), dew point (dewT), temperature,*  
 166 *and pressure). We performed the Wilcoxon tests to test the important of each feature to the*  
 167 *model. We run the model with original nine features (no drop), eight features (drop one feature),*  
 168 *seven features (drop two features), and six features (drop three features). The Wilcoxon tests*  
 169 *were carried out with two scenarios. The first case was to perform the Wilcoxon tests with the*  
 170 *actual ozone values and RFR prediction from feature drop. The second case was to perform the*  
 171 *Wilcoxon tests with RFR prediction from all nine features and RFR prediction from feature drop.*

172 Wilcoxon tests with the actual ozone values and RFR prediction with all nine features for five  
 173 different periods from 1994 to 2018. If the output from this test was less than or equal to 0.05  
 174 (colored in red), two samples were independent of one another, indicating the significance of  
 175 the dropped feature for the model prediction.

| <b>p-values</b>      | <b>94-98</b> | <b>99-03</b> | <b>04-08</b> | <b>09-13</b> | <b>14-18</b> |
|----------------------|--------------|--------------|--------------|--------------|--------------|
| Without feature drop | 0.17         | 0.30         | 0.10         | 0.10         | 0.25         |

176

177 Wilcoxon tests with the actual ozone values and RFR prediction from one feature drop for five  
 178 different periods from 1994 to 2018. If the output from this test was less than or equal to 0.05  
 179 (colored in red), two samples were independent of one another, indicating the significance of  
 180 the dropped feature for the model prediction.

| <b>p-values</b>  | <b>94-98</b> | <b>99-03</b> | <b>04-08</b> | <b>09-13</b> | <b>14-18</b> |
|------------------|--------------|--------------|--------------|--------------|--------------|
| drop visibility  | 0.01         | 0.75         | 0.02         | 0.07         | 0.29         |
| drop no2         | 0.13         | 0.14         | 0.00         | 0.00         | 0.73         |
| drop RH          | 0.17         | 0.32         | 0.09         | 0.12         | 0.20         |
| drop windSp      | 0.06         | 0.92         | 0.00         | 0.06         | 0.57         |
| drop windDir     | 0.17         | 0.26         | 0.05         | 0.07         | 0.28         |
| drop dewT        | 0.17         | 0.28         | 0.09         | 0.20         | 0.20         |
| drop no          | 0.00         | 0.49         | 0.11         | 0.11         | 0.09         |
| drop temperature | 0.19         | 0.31         | 0.08         | 0.16         | 0.17         |
| drop pressure    | 0.17         | 0.30         | 0.08         | 0.16         | 0.27         |

181

182

183

184

185 Wilcoxon tests with RFR prediction from all nine features and RFR prediction from one feature  
186 drop for five different periods from 1994 to 2018. If the output from this test was less than or  
187 equal to 0.05 (colored in red), two samples were independent of one another, indicating the  
188 significance of the dropped features for the model prediction.

| <b>p-values</b>  | <b>94-98</b> | <b>99-03</b> | <b>04-08</b> | <b>09-13</b> | <b>14-18</b> |
|------------------|--------------|--------------|--------------|--------------|--------------|
| drop visibility  | 0.15         | 0.50         | 0.49         | 0.88         | 0.91         |
| drop no2         | 0.86         | 0.68         | 0.04         | 0.05         | 0.14         |
| drop RH          | 0.98         | 0.97         | 0.90         | 0.89         | 0.92         |
| drop windSp      | 0.58         | 0.26         | 0.16         | 0.88         | 0.52         |
| drop windDir     | 0.98         | 0.90         | 0.75         | 0.90         | 0.95         |
| drop dewT        | 0.99         | 0.96         | 0.97         | 0.71         | 0.89         |
| drop no          | 0.03         | 0.71         | 0.00         | 0.90         | 0.55         |
| drop temperature | 0.92         | 1.00         | 0.90         | 0.82         | 0.82         |
| drop pressure    | 1.00         | 0.99         | 0.94         | 0.76         | 0.95         |

189

190 Wilcoxon tests with the actual ozone values and RFR prediction from two feature drop for five  
191 different periods from 1994 to 2018. If the output from this test was less than or equal to 0.05  
192 (colored in red), two samples were independent of one another, indicating the significance of  
193 the dropped features for the model prediction.

| <b>p-values</b>             | <b>94-98</b> | <b>99-03</b> | <b>04-08</b> | <b>09-13</b> | <b>14-18</b> |
|-----------------------------|--------------|--------------|--------------|--------------|--------------|
| drop temperature-windSp     | 0.02         | 0.83         | 0.00         | 0.11         | 0.52         |
| drop windSp-visibility      | 0.00         | 0.34         | 0.00         | 0.06         | 0.88         |
| drop dewT-no2               | 0.28         | 0.19         | 0.00         | 0.00         | 0.88         |
| drop temperature-windDir    | 0.18         | 0.28         | 0.05         | 0.09         | 0.33         |
| drop no2-no                 | 0.00         | 0.12         | 0.80         | 0.00         | 0.04         |
| drop RH-visibility          | 0.01         | 0.98         | 0.01         | 0.04         | 0.36         |
| drop temperature-visibility | 0.00         | 0.83         | 0.02         | 0.13         | 0.16         |
| drop windSp-no              | 0.00         | 0.27         | 0.59         | 0.02         | 0.64         |
| drop pressure-windDir       | 0.23         | 0.25         | 0.03         | 0.11         | 0.45         |
| drop windDir-dewT           | 0.24         | 0.21         | 0.08         | 0.06         | 0.28         |
| drop visibility-dewT        | 0.00         | 0.99         | 0.01         | 0.08         | 0.26         |

|                           |      |      |      |      |      |
|---------------------------|------|------|------|------|------|
| drop pressure-no          | 0.00 | 0.25 | 0.12 | 0.06 | 0.08 |
| drop temperature-no2      | 0.15 | 0.10 | 0.00 | 0.00 | 0.97 |
| drop windSp-no2           | 0.05 | 0.85 | 0.00 | 0.00 | 0.01 |
| drop pressure-visibility  | 0.01 | 0.96 | 0.01 | 0.10 | 0.35 |
| drop RH-windSp            | 0.06 | 0.74 | 0.00 | 0.07 | 0.57 |
| drop RH-windDir           | 0.24 | 0.27 | 0.07 | 0.04 | 0.55 |
| drop temperature-dewT     | 0.35 | 0.05 | 0.08 | 0.41 | 0.13 |
| drop RH-dewT              | 0.02 | 0.90 | 0.01 | 0.00 | 0.93 |
| drop visibility-no        | 0.00 | 0.97 | 0.67 | 0.06 | 0.11 |
| drop windSp-windDir       | 0.05 | 0.70 | 0.00 | 0.02 | 0.82 |
| drop windDir-no2          | 0.20 | 0.17 | 0.00 | 0.00 | 0.63 |
| drop pressure-dewT        | 0.26 | 0.32 | 0.09 | 0.11 | 0.23 |
| drop temperature-pressure | 0.14 | 0.26 | 0.05 | 0.20 | 0.13 |
| drop windDir-visibility   | 0.01 | 0.92 | 0.01 | 0.04 | 0.65 |
| drop windDir-no           | 0.00 | 0.56 | 0.21 | 0.03 | 0.08 |
| drop temperature-no       | 0.00 | 0.65 | 0.11 | 0.14 | 0.08 |
| drop visibility-no2       | 0.07 | 0.89 | 0.00 | 0.00 | 0.51 |
| drop temperature-RH       | 0.00 | 0.39 | 0.00 | 0.00 | 0.00 |
| drop RH-pressure          | 0.21 | 0.31 | 0.06 | 0.13 | 0.27 |
| drop dewT-no              | 0.00 | 0.73 | 0.11 | 0.06 | 0.13 |
| drop RH-no2               | 0.24 | 0.21 | 0.00 | 0.00 | 0.71 |
| drop RH-no                | 0.00 | 0.46 | 0.20 | 0.07 | 0.10 |
| drop pressure-no2         | 0.19 | 0.24 | 0.00 | 0.00 | 0.72 |
| drop pressure-windSp      | 0.07 | 0.99 | 0.00 | 0.02 | 0.65 |
| drop windSp-dewT          | 0.07 | 0.88 | 0.00 | 0.07 | 0.67 |

194

195 Wilcoxon tests with RFR prediction from all nine features and RFR prediction from two feature  
 196 drop for five different periods from 1994 to 2018. If the output from this test was less than or  
 197 equal to 0.05 (colored in red), two samples were independent of one another, indicating the  
 198 significance of the dropped features for the model prediction.

| <b>p-values</b>         | <b>94-98</b> | <b>99-03</b> | <b>04-08</b> | <b>09-13</b> | <b>14-18</b> |
|-------------------------|--------------|--------------|--------------|--------------|--------------|
| drop temperature-windSp | 0.31         | 0.22         | 0.10         | 0.94         | 0.58         |

|                             |      |      |      |      |      |
|-----------------------------|------|------|------|------|------|
| drop windSp-visibility      | 0.00 | 0.05 | 0.02 | 0.86 | 0.28 |
| drop dewT-no2               | 0.77 | 0.82 | 0.06 | 0.05 | 0.18 |
| drop temperature-windDir    | 0.96 | 0.97 | 0.78 | 0.97 | 0.86 |
| drop no2-no                 | 0.00 | 0.66 | 0.18 | 0.00 | 0.00 |
| drop RH-visibility          | 0.20 | 0.29 | 0.31 | 0.72 | 0.78 |
| drop temperature-visibility | 0.10 | 0.41 | 0.50 | 0.85 | 0.76 |
| drop windSp-no              | 0.00 | 0.03 | 0.27 | 0.49 | 0.47 |
| drop pressure-windDir       | 0.85 | 0.89 | 0.64 | 0.96 | 0.66 |
| drop windDir-dewT           | 0.83 | 0.78 | 0.90 | 0.82 | 0.93 |
| drop visibility-dewT        | 0.10 | 0.30 | 0.41 | 0.97 | 0.97 |
| drop pressure-no            | 0.03 | 0.91 | 0.00 | 0.84 | 0.52 |
| drop temperature-no2        | 0.90 | 0.54 | 0.03 | 0.05 | 0.27 |
| drop windSp-no2             | 0.51 | 0.21 | 0.00 | 0.00 | 0.00 |
| drop pressure-visibility    | 0.26 | 0.35 | 0.33 | 1.00 | 0.81 |
| drop RH-windSp              | 0.62 | 0.18 | 0.17 | 0.89 | 0.54 |
| drop RH-windDir             | 0.80 | 0.94 | 0.86 | 0.72 | 0.56 |
| drop temperature-dewT       | 0.67 | 0.38 | 0.97 | 0.01 | 0.73 |
| drop RH-dewT                | 0.30 | 0.40 | 0.36 | 0.05 | 0.20 |
| drop visibility-no          | 0.00 | 0.28 | 0.04 | 0.89 | 0.60 |
| drop windSp-windDir         | 0.53 | 0.17 | 0.05 | 0.55 | 0.14 |
| drop windDir-no2            | 0.96 | 0.78 | 0.04 | 0.01 | 0.10 |
| drop pressure-dewT          | 0.76 | 0.99 | 0.95 | 0.92 | 0.97 |
| drop temperature-pressure   | 0.89 | 0.90 | 0.75 | 0.71 | 0.73 |
| drop windDir-visibility     | 0.22 | 0.34 | 0.27 | 0.69 | 0.46 |
| drop windDir-no             | 0.04 | 0.63 | 0.00 | 0.59 | 0.50 |
| drop temperature-no         | 0.02 | 0.54 | 0.00 | 0.83 | 0.53 |
| drop visibility-no2         | 0.64 | 0.34 | 0.01 | 0.01 | 0.07 |
| drop temperature-RH         | 0.00 | 0.04 | 0.00 | 0.00 | 0.00 |
| drop RH-pressure            | 0.91 | 0.97 | 0.80 | 0.85 | 0.94 |
| drop dewT-no                | 0.04 | 0.45 | 0.00 | 0.86 | 0.67 |
| drop RH-no2                 | 0.81 | 0.86 | 0.04 | 0.06 | 0.12 |

|                      |      |      |      |      |      |
|----------------------|------|------|------|------|------|
| drop RH-no           | 0.03 | 0.74 | 0.00 | 0.91 | 0.59 |
| drop pressure-no2    | 0.97 | 0.92 | 0.03 | 0.01 | 0.12 |
| drop pressure-windSp | 0.67 | 0.32 | 0.07 | 0.59 | 0.45 |
| drop windSp-dewT     | 0.63 | 0.24 | 0.17 | 0.89 | 0.42 |

199

200 Wilcoxon tests with the actual ozone values and RFR prediction from three feature drop for five  
 201 different periods from 1994 to 2018. If the output from this test was less than or equal to 0.05  
 202 (colored in red), two samples were independent of one another, indicating the significance of  
 203 the dropped features for the model prediction.

| <b>p-values</b>                    | <b>94-98</b> | <b>99-03</b> | <b>04-08</b> | <b>09-13</b> | <b>14-18</b> |
|------------------------------------|--------------|--------------|--------------|--------------|--------------|
| drop temperature-visibility-no     | 0.00         | 0.97         | 0.67         | 0.07         | 0.14         |
| drop RH-dewT-no                    | 0.00         | 0.99         | 0.63         | 0.00         | 0.95         |
| drop temperature-windDir-dewT      | 0.48         | 0.01         | 0.02         | 0.86         | 0.54         |
| drop pressure-windSp-windDir       | 0.10         | 0.75         | 0.00         | 0.01         | 0.61         |
| drop temperature-visibility-dewT   | 0.03         | 0.25         | 0.00         | 0.52         | 0.45         |
| drop windDir-visibility-no2        | 0.05         | 0.93         | 0.00         | 0.00         | 0.54         |
| drop windDir-dewT-no               | 0.00         | 0.54         | 0.18         | 0.04         | 0.19         |
| drop windSp-dewT-no                | 0.00         | 0.18         | 0.89         | 0.01         | 0.57         |
| drop temperature-RH-pressure       | 0.00         | 0.74         | 0.00         | 0.00         | 0.00         |
| drop RH-windDir-visibility         | 0.01         | 0.95         | 0.00         | 0.01         | 0.65         |
| drop windSp-windDir-visibility     | 0.00         | 0.24         | 0.00         | 0.01         | 0.74         |
| drop RH-pressure-dewT              | 0.03         | 0.97         | 0.01         | 0.00         | 0.43         |
| drop windSp-windDir-no2            | 0.04         | 0.42         | 0.00         | 0.00         | 0.00         |
| drop visibility-dewT-no            | 0.00         | 0.77         | 0.78         | 0.03         | 0.10         |
| drop temperature-windSp-visibility | 0.00         | 0.18         | 0.00         | 0.07         | 0.45         |
| drop temperature-windDir-no2       | 0.12         | 0.18         | 0.00         | 0.00         | 0.72         |
| drop RH-visibility-no2             | 0.08         | 0.86         | 0.00         | 0.00         | 0.89         |
| drop temperature-visibility-no2    | 0.07         | 0.66         | 0.00         | 0.00         | 0.74         |
| drop pressure-dewT-no              | 0.00         | 0.29         | 0.15         | 0.05         | 0.04         |
| drop RH-windSp-windDir             | 0.06         | 0.70         | 0.00         | 0.01         | 0.98         |
| drop windSp-dewT-no2               | 0.04         | 0.73         | 0.00         | 0.00         | 0.01         |
| drop temperature-windSp-windDir    | 0.01         | 0.60         | 0.00         | 0.02         | 0.73         |

|                                  |      |      |      |      |      |
|----------------------------------|------|------|------|------|------|
| drop RH-no2-no                   | 0.00 | 0.19 | 0.88 | 0.00 | 0.02 |
| drop pressure-windSp-no          | 0.00 | 0.43 | 0.72 | 0.01 | 0.50 |
| drop windSp-windDir-no           | 0.00 | 0.02 | 0.24 | 0.00 | 0.96 |
| drop temperature-RH-windSp       | 0.00 | 0.00 | 0.00 | 0.00 | 0.00 |
| drop temperature-dewT-no2        | 0.19 | 0.01 | 0.01 | 0.26 | 0.92 |
| drop temperature-RH-no           | 0.00 | 0.11 | 0.01 | 0.00 | 0.00 |
| drop windSp-visibility-no        | 0.00 | 0.13 | 0.08 | 0.01 | 0.51 |
| drop temperature-windDir-no      | 0.00 | 0.59 | 0.18 | 0.06 | 0.33 |
| drop temperature-pressure-dewT   | 0.69 | 0.00 | 0.02 | 0.42 | 0.11 |
| drop pressure-no2-no             | 0.00 | 0.21 | 0.95 | 0.00 | 0.06 |
| drop temperature-RH-dewT         | 0.00 | 0.55 | 0.00 | 0.00 | 0.00 |
| drop pressure-dewT-no2           | 0.28 | 0.19 | 0.00 | 0.00 | 0.72 |
| drop RH-windSp-dewT              | 0.00 | 0.11 | 0.00 | 0.00 | 0.21 |
| drop windDir-visibility-dewT     | 0.01 | 0.81 | 0.02 | 0.03 | 0.65 |
| drop windDir-no2-no              | 0.00 | 0.25 | 0.74 | 0.00 | 0.00 |
| drop windSp-visibility-dewT      | 0.00 | 0.38 | 0.00 | 0.02 | 0.83 |
| drop pressure-windDir-dewT       | 0.29 | 0.28 | 0.03 | 0.08 | 0.45 |
| drop temperature-RH-windDir      | 0.00 | 0.17 | 0.00 | 0.00 | 0.00 |
| drop RH-windDir-no               | 0.00 | 0.62 | 0.24 | 0.04 | 0.09 |
| drop windDir-dewT-no2            | 0.15 | 0.23 | 0.00 | 0.00 | 0.38 |
| drop temperature-pressure-no2    | 0.12 | 0.18 | 0.00 | 0.00 | 0.79 |
| drop RH-windSp-no                | 0.00 | 0.23 | 0.64 | 0.02 | 0.72 |
| drop dewT-no2-no                 | 0.00 | 0.12 | 0.95 | 0.00 | 0.04 |
| drop windSp-windDir-dewT         | 0.08 | 0.79 | 0.00 | 0.03 | 0.83 |
| drop RH-pressure-windDir         | 0.27 | 0.28 | 0.04 | 0.06 | 0.51 |
| drop RH-pressure-visibility      | 0.00 | 0.89 | 0.01 | 0.07 | 0.49 |
| drop pressure-windSp-no2         | 0.01 | 0.30 | 0.00 | 0.00 | 0.01 |
| drop pressure-windDir-visibility | 0.02 | 0.98 | 0.00 | 0.03 | 0.42 |
| drop RH-pressure-no2             | 0.14 | 0.35 | 0.00 | 0.00 | 0.66 |
| drop RH-pressure-no              | 0.00 | 0.42 | 0.14 | 0.03 | 0.06 |
| drop RH-dewT-no2                 | 0.01 | 0.53 | 0.00 | 0.00 | 0.02 |

|                                      |      |      |      |      |      |
|--------------------------------------|------|------|------|------|------|
| drop visibility-dewT-no2             | 0.10 | 0.88 | 0.00 | 0.00 | 0.64 |
| drop temperature-RH-visibility       | 0.00 | 0.11 | 0.00 | 0.00 | 0.00 |
| drop windDir-visibility-no           | 0.00 | 0.75 | 0.99 | 0.04 | 0.25 |
| drop temperature-pressure-visibility | 0.01 | 0.97 | 0.01 | 0.13 | 0.20 |
| drop temperature-windSp-dewT         | 0.04 | 0.81 | 0.00 | 0.77 | 0.43 |
| drop RH-windSp-no2                   | 0.05 | 0.60 | 0.00 | 0.00 | 0.01 |
| drop pressure-visibility-dewT        | 0.00 | 0.92 | 0.01 | 0.04 | 0.30 |
| drop temperature-windSp-no           | 0.00 | 0.17 | 0.66 | 0.04 | 0.48 |
| drop pressure-windDir-no2            | 0.11 | 0.44 | 0.00 | 0.00 | 0.74 |
| drop RH-visibility-no                | 0.00 | 0.91 | 0.84 | 0.03 | 0.11 |
| drop windSp-visibility-no2           | 0.01 | 0.08 | 0.00 | 0.00 | 0.01 |
| drop temperature-pressure-windDir    | 0.21 | 0.20 | 0.03 | 0.07 | 0.23 |
| drop temperature-windSp-no2          | 0.04 | 0.85 | 0.00 | 0.00 | 0.02 |
| drop RH-visibility-dewT              | 0.00 | 0.85 | 0.00 | 0.00 | 0.71 |
| drop pressure-windSp-dewT            | 0.06 | 0.92 | 0.00 | 0.03 | 0.53 |
| drop pressure-windDir-no             | 0.00 | 0.33 | 0.29 | 0.02 | 0.16 |
| drop visibility-no2-no               | 0.00 | 0.62 | 0.25 | 0.00 | 0.02 |
| drop temperature-no2-no              | 0.00 | 0.09 | 0.70 | 0.00 | 0.00 |
| drop temperature-pressure-windSp     | 0.03 | 0.90 | 0.00 | 0.07 | 0.45 |
| drop windSp-no2-no                   | 0.00 | 0.03 | 0.00 | 0.00 | 0.00 |
| drop temperature-pressure-no         | 0.00 | 0.44 | 0.12 | 0.05 | 0.07 |
| drop pressure-visibility-no2         | 0.11 | 0.88 | 0.00 | 0.00 | 0.66 |
| drop pressure-visibility-no          | 0.00 | 0.80 | 0.65 | 0.03 | 0.06 |
| drop temperature-windDir-visibility  | 0.01 | 0.90 | 0.00 | 0.08 | 0.36 |
| drop RH-pressure-windSp              | 0.06 | 0.96 | 0.00 | 0.04 | 0.75 |
| drop temperature-RH-no2              | 0.00 | 0.24 | 0.00 | 0.00 | 0.00 |
| drop pressure-windSp-visibility      | 0.00 | 0.25 | 0.00 | 0.02 | 0.96 |
| drop RH-windDir-no2                  | 0.18 | 0.28 | 0.00 | 0.00 | 0.58 |
| drop temperature-dewT-no             | 0.00 | 0.07 | 0.01 | 0.70 | 0.15 |
| drop RH-windSp-visibility            | 0.00 | 0.31 | 0.00 | 0.04 | 0.95 |
| drop RH-windDir-dewT                 | 0.02 | 0.92 | 0.01 | 0.00 | 0.58 |

205 Wilcoxon tests with RFR prediction from all nine features and RFR prediction from three feature  
 206 drop for five different periods from 1994 to 2018. If the output from this test was less than or  
 207 equal to 0.05 (colored in red), two samples were independent of one another, indicating the  
 208 significance of the dropped features for the model prediction.

| <b>p-values</b>                    | <b>94-98</b> | <b>99-03</b> | <b>04-08</b> | <b>09-13</b> | <b>14-18</b> |
|------------------------------------|--------------|--------------|--------------|--------------|--------------|
| drop temperature-visibility-no     | 0.00         | 0.32         | 0.03         | 0.94         | 0.69         |
| drop RH-dewT-no                    | 0.00         | 0.33         | 0.03         | 0.01         | 0.27         |
| drop temperature-windDir-dewT      | 0.53         | 0.16         | 0.56         | 0.05         | 0.57         |
| drop pressure-windSp-windDir       | 0.74         | 0.18         | 0.01         | 0.39         | 0.08         |
| drop temperature-visibility-dewT   | 0.40         | 0.93         | 0.18         | 0.02         | 0.67         |
| drop windDir-visibility-no2        | 0.54         | 0.32         | 0.00         | 0.01         | 0.08         |
| drop windDir-dewT-no               | 0.07         | 0.66         | 0.00         | 0.74         | 0.85         |
| drop windSp-dewT-no                | 0.00         | 0.01         | 0.13         | 0.47         | 0.53         |
| drop temperature-RH-pressure       | 0.00         | 0.13         | 0.00         | 0.00         | 0.00         |
| drop RH-windDir-visibility         | 0.16         | 0.34         | 0.23         | 0.39         | 0.46         |
| drop windSp-windDir-visibility     | 0.00         | 0.03         | 0.00         | 0.29         | 0.12         |
| drop RH-pressure-dewT              | 0.44         | 0.34         | 0.26         | 0.06         | 0.05         |
| drop windSp-windDir-no2            | 0.48         | 0.06         | 0.00         | 0.00         | 0.00         |
| drop visibility-dewT-no            | 0.00         | 0.45         | 0.05         | 0.67         | 0.60         |
| drop temperature-windSp-visibility | 0.00         | 0.02         | 0.01         | 0.89         | 0.67         |
| drop temperature-windDir-no2       | 0.85         | 0.77         | 0.03         | 0.03         | 0.13         |
| drop RH-visibility-no2             | 0.65         | 0.21         | 0.00         | 0.01         | 0.21         |
| drop temperature-visibility-no2    | 0.61         | 0.56         | 0.00         | 0.02         | 0.15         |
| drop pressure-dewT-no              | 0.04         | 0.99         | 0.00         | 0.81         | 0.33         |
| drop RH-windSp-windDir             | 0.59         | 0.16         | 0.07         | 0.43         | 0.22         |
| drop windSp-dewT-no2               | 0.45         | 0.16         | 0.00         | 0.00         | 0.00         |
| drop temperature-windSp-windDir    | 0.24         | 0.12         | 0.02         | 0.53         | 0.11         |
| drop RH-no2-no                     | 0.00         | 0.82         | 0.14         | 0.00         | 0.00         |
| drop pressure-windSp-no            | 0.00         | 0.06         | 0.18         | 0.28         | 0.60         |
| drop windSp-windDir-no             | 0.00         | 0.00         | 0.63         | 0.18         | 0.21         |
| drop temperature-RH-windSp         | 0.00         | 0.00         | 0.00         | 0.00         | 0.00         |
| drop temperature-dewT-no2          | 0.99         | 0.16         | 0.30         | 0.58         | 0.30         |



|                                      |      |      |      |      |      |
|--------------------------------------|------|------|------|------|------|
| drop temperature-RH-no               | 0.00 | 0.00 | 0.36 | 0.00 | 0.00 |
| drop windSp-visibility-no            | 0.00 | 0.01 | 0.91 | 0.30 | 0.60 |
| drop temperature-windDir-no          | 0.01 | 0.59 | 0.00 | 0.87 | 0.89 |
| drop temperature-pressure-dewT       | 0.38 | 0.01 | 0.57 | 0.01 | 0.62 |
| drop pressure-no2-no                 | 0.00 | 0.82 | 0.11 | 0.00 | 0.00 |
| drop temperature-RH-dewT             | 0.00 | 0.08 | 0.00 | 0.00 | 0.00 |
| drop pressure-dewT-no2               | 0.77 | 0.81 | 0.01 | 0.03 | 0.12 |
| drop RH-windSp-dewT                  | 0.04 | 0.01 | 0.00 | 0.03 | 0.01 |
| drop windDir-visibility-dewT         | 0.14 | 0.44 | 0.44 | 0.57 | 0.46 |
| drop windDir-no2-no                  | 0.00 | 0.94 | 0.18 | 0.00 | 0.00 |
| drop windSp-visibility-dewT          | 0.01 | 0.06 | 0.02 | 0.54 | 0.30 |
| drop pressure-windDir-dewT           | 0.73 | 0.95 | 0.61 | 0.92 | 0.68 |
| drop temperature-RH-windDir          | 0.00 | 0.01 | 0.00 | 0.00 | 0.00 |
| drop RH-windDir-no                   | 0.05 | 0.56 | 0.00 | 0.74 | 0.57 |
| drop windDir-dewT-no2                | 0.94 | 0.86 | 0.04 | 0.01 | 0.05 |
| drop temperature-pressure-no2        | 0.83 | 0.77 | 0.02 | 0.05 | 0.15 |
| drop RH-windSp-no                    | 0.00 | 0.02 | 0.25 | 0.51 | 0.40 |
| drop dewT-no2-no                     | 0.00 | 0.60 | 0.12 | 0.00 | 0.00 |
| drop windSp-windDir-dewT             | 0.68 | 0.19 | 0.13 | 0.64 | 0.15 |
| drop RH-pressure-windDir             | 0.74 | 0.89 | 0.70 | 0.79 | 0.58 |
| drop RH-pressure-visibility          | 0.07 | 0.39 | 0.22 | 0.87 | 0.60 |
| drop pressure-windSp-no2             | 0.22 | 0.04 | 0.00 | 0.00 | 0.00 |
| drop pressure-windDir-visibility     | 0.31 | 0.32 | 0.20 | 0.58 | 0.73 |
| drop RH-pressure-no2                 | 0.90 | 0.91 | 0.02 | 0.02 | 0.12 |
| drop RH-pressure-no                  | 0.08 | 0.79 | 0.00 | 0.65 | 0.42 |
| drop RH-dewT-no2                     | 0.17 | 0.71 | 0.00 | 0.00 | 0.00 |
| drop visibility-dewT-no2             | 0.72 | 0.33 | 0.00 | 0.02 | 0.11 |
| drop temperature-RH-visibility       | 0.00 | 0.01 | 0.00 | 0.00 | 0.00 |
| drop windDir-visibility-no           | 0.00 | 0.17 | 0.09 | 0.68 | 0.94 |
| drop temperature-pressure-visibility | 0.17 | 0.33 | 0.27 | 0.88 | 0.90 |
| drop temperature-windSp-dewT         | 0.40 | 0.17 | 0.07 | 0.04 | 0.67 |

|                                     |      |      |      |      |      |
|-------------------------------------|------|------|------|------|------|
| drop RH-windSp-no2                  | 0.57 | 0.11 | 0.00 | 0.00 | 0.00 |
| drop pressure-visibility-dewT       | 0.11 | 0.37 | 0.34 | 0.67 | 0.91 |
| drop temperature-windSp-no          | 0.00 | 0.01 | 0.21 | 0.68 | 0.64 |
| drop pressure-windDir-no2           | 0.82 | 0.76 | 0.04 | 0.01 | 0.16 |
| drop RH-visibility-no               | 0.00 | 0.24 | 0.06 | 0.60 | 0.59 |
| drop windSp-visibility-no2          | 0.13 | 0.00 | 0.00 | 0.00 | 0.00 |
| drop temperature-pressure-windDir   | 0.91 | 0.79 | 0.54 | 0.89 | 0.94 |
| drop temperature-windSp-no2         | 0.46 | 0.22 | 0.00 | 0.00 | 0.00 |
| drop RH-visibility-dewT             | 0.03 | 0.27 | 0.09 | 0.11 | 0.12 |
| drop pressure-windSp-dewT           | 0.59 | 0.37 | 0.09 | 0.66 | 0.56 |
| drop pressure-windDir-no            | 0.05 | 0.91 | 0.00 | 0.51 | 0.76 |
| drop visibility-no2-no              | 0.01 | 0.53 | 0.67 | 0.00 | 0.00 |
| drop temperature-no2-no             | 0.00 | 0.56 | 0.22 | 0.00 | 0.00 |
| drop temperature-pressure-windSp    | 0.40 | 0.26 | 0.05 | 0.87 | 0.67 |
| drop windSp-no2-no                  | 0.00 | 0.00 | 0.01 | 0.00 | 0.00 |
| drop temperature-pressure-no        | 0.03 | 0.77 | 0.00 | 0.84 | 0.49 |
| drop pressure-visibility-no2        | 0.81 | 0.23 | 0.00 | 0.01 | 0.11 |
| drop pressure-visibility-no         | 0.00 | 0.43 | 0.03 | 0.61 | 0.42 |
| drop temperature-windDir-visibility | 0.16 | 0.38 | 0.22 | 0.93 | 0.82 |
| drop RH-pressure-windSp             | 0.60 | 0.35 | 0.09 | 0.75 | 0.36 |
| drop temperature-RH-no2             | 0.00 | 0.02 | 0.00 | 0.00 | 0.00 |
| drop pressure-windSp-visibility     | 0.01 | 0.03 | 0.01 | 0.49 | 0.24 |
| drop RH-windDir-no2                 | 0.98 | 0.98 | 0.03 | 0.01 | 0.09 |
| drop temperature-dewT-no            | 0.05 | 0.53 | 0.00 | 0.03 | 0.74 |
| drop RH-windSp-visibility           | 0.01 | 0.04 | 0.02 | 0.68 | 0.25 |
| drop RH-windDir-dewT                | 0.33 | 0.39 | 0.25 | 0.03 | 0.09 |

209

210 *Table set S2. Statistical evaluation for three dropped features.*

211 Statistical evaluation for three dropped features from 1994 to 1998. P-value ( $p$ ) and  $h$  were from  
212 Wilcoxon test with actual ozone values and RFR prediction from three feature drop.  $h$  is 1 when  
213  $p$  is less than or equal to 0.05. CC is the correlation coefficient, and NMB is the normal mean bias.

| Features Drop | $p$ | $h$ | CC | NMB |
|---------------|-----|-----|----|-----|
|---------------|-----|-----|----|-----|

|                                  |          |   |          |          |
|----------------------------------|----------|---|----------|----------|
| drop temperature-visibility-no   | 7.00E-06 | 1 | 0.801784 | -0.14274 |
| drop temperature-windDir-dewT    | 0.45695  | 0 | 0.783211 | -0.07695 |
| drop temperature-visibility-dewT | 0.031928 | 1 | 0.683842 | -0.1173  |
| drop temperature-RH-pressure     | 3.93E-10 | 1 | 0.671577 | -0.18099 |
| drop temperature-RH-windSp       | 1.04E-28 | 1 | 0.601521 | -0.2818  |
| drop temperature-dewT-no2        | 0.181967 | 0 | 0.759473 | -0.09037 |
| drop temperature-RH-no           | 1.44E-17 | 1 | 0.626231 | -0.23009 |
| drop windSp-visibility-no        | 3.62E-10 | 1 | 0.782998 | -0.17465 |
| drop temperature-pressure-dewT   | 0.664721 | 0 | 0.739901 | -0.07331 |
| drop pressure-no2-no             | 1.97E-06 | 1 | 0.793104 | -0.13027 |
| drop temperature-RH-dewT         | 3.45E-11 | 1 | 0.662465 | -0.19932 |
| drop windDir-no2-no              | 1.50E-05 | 1 | 0.804392 | -0.12553 |
| drop temperature-RH-windDir      | 9.89E-11 | 1 | 0.685107 | -0.18846 |
| drop temperature-RH-visibility   | 3.48E-12 | 1 | 0.666221 | -0.19847 |
| drop windDir-visibility-no       | 1.42E-05 | 1 | 0.796187 | -0.13747 |
| drop temperature-windSp-dewT     | 0.033606 | 1 | 0.743337 | -0.10844 |
| drop visibility-no2-no           | 0.000221 | 1 | 0.78021  | -0.1251  |
| drop temperature-no2-no          | 2.53E-06 | 1 | 0.80524  | -0.13841 |
| drop windSp-no2-no               | 3.36E-10 | 1 | 0.791098 | -0.16675 |
| drop pressure-visibility-no      | 9.97E-06 | 1 | 0.795026 | -0.13594 |
| drop temperature-RH-no2          | 2.95E-10 | 1 | 0.683469 | -0.18164 |
| drop temperature-dewT-no         | 0.001461 | 1 | 0.734516 | -0.13513 |

214

215 Statistical evaluation for three dropped features from 1999 to 2003. P-value (p) and h were from  
 216 Wilcoxon test with actual ozone values and RFR prediction from three feature drop. h is 1 when  
 217 p is less than or equal to 0.05. CC is the correlation coefficient, and NMB is the normal mean bias.

| Features Drop                    | p        | h | CC       | NMB      |
|----------------------------------|----------|---|----------|----------|
| drop temperature-windDir-dewT    | 0.012967 | 1 | 0.787945 | 0.024295 |
| drop temperature-visibility-dewT | 0.262872 | 0 | 0.783029 | -0.00334 |
| drop temperature-RH-pressure     | 0.711    | 0 | 0.735766 | -0.04654 |
| drop RH-no2-no                   | 0.202349 | 0 | 0.765157 | 0.000328 |
| drop pressure-windSp-no          | 0.41427  | 0 | 0.807998 | -0.04159 |
| drop temperature-RH-windSp       | 2.80E-14 | 1 | 0.669267 | -0.19542 |
| drop temperature-dewT-no2        | 0.01234  | 1 | 0.770627 | 0.02407  |
| drop temperature-RH-no           | 0.099614 | 0 | 0.710964 | -0.07459 |
| drop temperature-pressure-dewT   | 0.000216 | 1 | 0.745702 | 0.048967 |
| drop pressure-no2-no             | 0.218405 | 0 | 0.747899 | 0.003472 |
| drop temperature-RH-dewT         | 0.526379 | 0 | 0.697282 | -0.04446 |
| drop windDir-no2-no              | 0.258033 | 0 | 0.765861 | -0.00022 |
| drop temperature-RH-windDir      | 0.161704 | 0 | 0.754945 | -0.06661 |
| drop dewT-no2-no                 | 0.122467 | 0 | 0.762824 | 0.007162 |
| drop temperature-RH-visibility   | 0.106475 | 0 | 0.762941 | -0.06819 |

|                              |          |   |          |          |
|------------------------------|----------|---|----------|----------|
| drop temperature-windSp-dewT | 0.780732 | 0 | 0.760772 | -0.03486 |
| drop visibility-no2-no       | 0.639241 | 0 | 0.744436 | -0.01202 |
| drop temperature-no2-no      | 0.096085 | 0 | 0.767118 | 0.00764  |
| drop windSp-no2-no           | 0.030094 | 1 | 0.725952 | -0.06466 |
| drop pressure-visibility-no  | 0.824903 | 0 | 0.808422 | -0.01421 |
| drop temperature-RH-no2      | 0.231534 | 0 | 0.733835 | -0.05912 |
| drop temperature-dewT-no     | 0.072791 | 0 | 0.74421  | 0.000943 |

218

219

220 Statistical evaluation for three dropped features from 2004 to 2008. P-value ( $p$ ) and  $h$  were from  
 221 Wilcoxon test with actual ozone values and RFR prediction from three feature drop.  $h$  is 1 when  
 222  $p$  is less than or equal to 0.05. CC is the correlation coefficient, and NMB is the normal mean bias.

| Features Drop                  | $p$      | $h$ | CC       | NMB      |
|--------------------------------|----------|-----|----------|----------|
| drop temperature-RH-pressure   | 9.15E-09 | 1   | 0.691019 | -0.11974 |
| drop RH-no2-no                 | 0.851888 | 0   | 0.789129 | -0.01003 |
| drop temperature-RH-windSp     | 8.93E-33 | 1   | 0.638616 | -0.21775 |
| drop temperature-RH-no         | 0.008522 | 1   | 0.667063 | -0.06782 |
| drop temperature-pressure-dewT | 0.021587 | 1   | 0.778933 | -0.05898 |
| drop pressure-no2-no           | 0.92948  | 0   | 0.770663 | -0.00919 |
| drop temperature-RH-dewT       | 8.00E-10 | 1   | 0.708957 | -0.128   |
| drop windDir-no2-no            | 0.713252 | 0   | 0.778714 | -0.01301 |
| drop temperature-RH-windDir    | 7.14E-09 | 1   | 0.734965 | -0.1192  |
| drop dewT-no2-no               | 0.925348 | 0   | 0.786617 | -0.00787 |
| drop temperature-RH-visibility | 6.06E-09 | 1   | 0.737463 | -0.12258 |
| drop visibility-no2-no         | 0.239182 | 0   | 0.779829 | -0.02533 |
| drop temperature-no2-no        | 0.674961 | 0   | 0.787052 | -0.01177 |
| drop windSp-no2-no             | 6.79E-05 | 1   | 0.759365 | -0.0697  |
| drop temperature-RH-no2        | 5.96E-13 | 1   | 0.717344 | -0.13626 |
| drop temperature-dewT-no       | 0.014611 | 1   | 0.753523 | 0.018978 |

223

224 Statistical evaluation for three dropped features from 2009 to 2013. P-value ( $p$ ) and  $h$  were from  
 225 Wilcoxon test with actual ozone values and RFR prediction from three feature drop.  $h$  is 1 when  
 226  $p$  is less than or equal to 0.05. CC is the correlation coefficient, and NMB is the normal mean bias.

| Features Drop                    | $p$      | $h$ | CC       | NMB      |
|----------------------------------|----------|-----|----------|----------|
| drop temperature-windDir-dewT    | 0.886059 | 0   | 0.79726  | -0.01132 |
| drop temperature-visibility-dewT | 0.539812 | 0   | 0.802949 | -0.00061 |
| drop RH-no2-no                   | 3.53E-07 | 1   | 0.780223 | -0.07705 |
| drop temperature-RH-windSp       | 2.09E-23 | 1   | 0.603255 | -0.16104 |
| drop temperature-dewT-no2        | 0.250885 | 0   | 0.76968  | -0.02417 |
| drop temperature-RH-no           | 1.48E-10 | 1   | 0.646956 | -0.10852 |

|                                |          |   |          |          |
|--------------------------------|----------|---|----------|----------|
| drop temperature-pressure-dewT | 0.434343 | 0 | 0.775243 | -0.00507 |
| drop pressure-no2-no           | 6.43E-07 | 1 | 0.767951 | -0.07716 |
| drop temperature-RH-dewT       | 1.15E-12 | 1 | 0.66335  | -0.1142  |
| drop windDir-no2-no            | 3.26E-07 | 1 | 0.777546 | -0.08089 |
| drop temperature-RH-windDir    | 1.62E-11 | 1 | 0.675657 | -0.1131  |
| drop dewT-no2-no               | 1.87E-07 | 1 | 0.785766 | -0.07794 |
| drop temperature-RH-visibility | 4.33E-11 | 1 | 0.670451 | -0.1106  |
| drop temperature-windSp-dewT   | 0.797974 | 0 | 0.790291 | -0.00799 |
| drop visibility-no2-no         | 7.29E-09 | 1 | 0.774264 | -0.08313 |
| drop temperature-no2-no        | 9.26E-07 | 1 | 0.787752 | -0.07393 |
| drop windSp-no2-no             | 2.23E-14 | 1 | 0.750573 | -0.10816 |
| drop temperature-RH-no2        | 2.27E-17 | 1 | 0.646149 | -0.13188 |
| drop temperature-dewT-no       | 0.726114 | 0 | 0.755332 | -0.00863 |

227

228 Statistical evaluation for three dropped features from 2014 to 2018. P-value (p) and h were from  
 229 Wilcoxon test with actual ozone values and RFR prediction from three feature drop. h is 1 when  
 230 p is less than or equal to 0.05. CC is the correlation coefficient, and NMB is the normal mean bias.

| Features Drop                    | p        | h | CC       | NMB      |
|----------------------------------|----------|---|----------|----------|
| drop temperature-windDir-dewT    | 0.561955 | 0 | 0.769046 | -0.0127  |
| drop temperature-visibility-dewT | 0.464277 | 0 | 0.771125 | -0.01168 |
| drop temperature-RH-pressure     | 0.000239 | 1 | 0.633839 | -0.06806 |
| drop temperature-RH-windSp       | 5.46E-13 | 1 | 0.623159 | -0.11354 |
| drop temperature-dewT-no2        | 0.948555 | 0 | 0.734269 | -0.01476 |
| drop temperature-RH-no           | 2.63E-05 | 1 | 0.632899 | -0.07046 |
| drop temperature-pressure-dewT   | 0.112191 | 0 | 0.721429 | -0.00148 |
| drop pressure-no2-no             | 0.053613 | 0 | 0.772973 | -0.02917 |
| drop temperature-RH-dewT         | 5.74E-07 | 1 | 0.643603 | -0.08532 |
| drop windDir-no2-no              | 0.004348 | 1 | 0.776112 | -0.04655 |
| drop temperature-RH-windDir      | 0.000919 | 1 | 0.656068 | -0.06274 |
| drop dewT-no2-no                 | 0.035604 | 1 | 0.802024 | -0.03372 |
| drop pressure-windSp-no2         | 0.004735 | 1 | 0.800965 | -0.04549 |
| drop temperature-RH-visibility   | 0.000253 | 1 | 0.655908 | -0.06693 |
| drop temperature-windSp-dewT     | 0.445095 | 0 | 0.742402 | -0.0126  |
| drop visibility-no2-no           | 0.019345 | 1 | 0.785613 | -0.0343  |
| drop temperature-no2-no          | 0.004275 | 1 | 0.800114 | -0.04446 |
| drop windSp-no2-no               | 2.45E-08 | 1 | 0.769147 | -0.07873 |
| drop temperature-RH-no2          | 1.11E-07 | 1 | 0.618039 | -0.0844  |
| drop temperature-dewT-no         | 0.15424  | 0 | 0.74638  | 0.002089 |

231

232 *Table S3. CMAQ MDA8 Fontana*

| Month | MBE      | NMB      | MAE      | MFB      | MFE      |
|-------|----------|----------|----------|----------|----------|
| 5     | 6.059286 | 0.125268 | 8.270714 | 0.133177 | 0.173034 |
| 6     | 8.99     | 0.141363 | 11.56667 | 0.145812 | 0.179497 |
| 7     | 9.504032 | 0.140691 | 13.125   | 0.138504 | 0.192391 |
| 8     | -3.76042 | -0.04737 | 13.84077 | -0.03533 | 0.175221 |
| 9     | 13.95382 | 0.235017 | 15.64347 | 0.225449 | 0.247755 |

233

234

235 **Evaluation Metrics**  
236 Correlation coefficient

237 
$$CC = \frac{\sum_{i=1}^N (M_i - \bar{M})(O_i - \bar{O})}{[\sum_{i=1}^N (M_i - \bar{M})^2 \sum_{i=1}^N (O_i - \bar{O})^2]^{\frac{1}{2}}} \quad (1)$$

238 Mean bias error:

239 
$$MBE = \frac{1}{N} \sum_{i=1}^N (M_i - O_i) \quad (2)$$

240 Mean absolute error:

241 
$$MAE = \frac{1}{N} \sum_{i=1}^N |M_i - O_i| \quad (3)$$

242 Root mean square error:

243 
$$RMSE = \left[ \frac{1}{N} \sum_{i=1}^N (M_i - O_i)^2 \right]^{\frac{1}{2}} \quad (4)$$

244 Relative root mean square error:

245 
$$rRMSE = \frac{\left[ \frac{1}{N} \sum_{i=1}^N (M_i - O_i)^2 \right]^{\frac{1}{2}}}{\frac{1}{N} \sum_{i=1}^N O_i} \quad (5)$$

246 Mean normalized bias:

247 
$$MNB = \frac{1}{N} \sum_{i=1}^N \frac{M_i - O_i}{O_i} \quad (6)$$

248 Mean normalized absolute error:

249 
$$MNAE = \frac{1}{N} \sum_{i=1}^N \frac{|M_i - O_i|}{O_i} \quad (7)$$

250 Normalized mean bias:

251 
$$NMB = \frac{\sum_{i=1}^N (M_i - O_i)}{\sum_{i=1}^N O_i} \quad (8)$$

252 Normalized mean absolute error:

$$253 \quad NMAE = \frac{\sum_{i=1}^N |M_i - O_i|}{\sum_{i=1}^N O_i} \quad (9)$$

254 Fractional bias:

$$255 \quad FB = \frac{1}{N} \sum_{i=1}^N \frac{M_i - O_i}{(M_i + O_i)/2} \quad (10)$$

256 Fractional absolute error:

$$257 \quad FAE = \frac{1}{N} \sum_{i=1}^N \frac{|M_i - O_i|}{(M_i + O_i)/2} \quad (11)$$

258 Model mean:

$$259 \quad \bar{M} = \frac{1}{N} \sum_{i=1}^N M_i \quad (12)$$

260

261 Observational mean:

$$262 \quad \bar{O} = \frac{1}{N} \sum_{i=1}^N O_i \quad (13)$$

263 We evaluated the regression algorithms using the intrinsic metrics of linear fit (e.g.,  $R^2$ , slope, and  
264 intercept), CC, RMSE, and MAE. We evaluated different classification algorithms based on probability of  
265 detection (PoD), accuracy, model error, and failure to predict (Eqs. 14-17).

266 Probability of detection:

$$267 \quad PoD = \frac{\text{True predicted exceedances}}{\text{Observed exceedances}} = \frac{d}{b + d} \quad (14)$$

268 Accuracy:

$$269 \quad Accuracy = \frac{a + d}{a + b + c + d} \quad (15)$$

270 Model Error:



271 
$$Error = \frac{b + c}{a + b + c + d} \quad (16)$$

272 Failure to predict:

273 
$$Failure\ to\ predict = 1 - PoD \quad (17)$$

274

275 In Eqs. 15 and 16,  $a$  is the number of correct non-exceedance predictions;  $b$  is the number of  
276 incorrect non-exceedance predictions;  $c$  is the number of incorrect exceedance prediction; and  $d$  is the  
277 number of correct exceedance predictions.

278

279 **A Direct Comparison between ML and CMAQ**

280 We compared the performance between the ML prediction and CMAQ simulation for ozone  
 281 concentrations. We used the ML model that was trained on ONT meteorology with Fontana air quality to  
 282 predict the ozone concentrations for the period from May to October of 2017. Figure S25 shows a time  
 283 series of daily average ozone concentrations which were predicted by RFR model (red line). The RFR model  
 284 well captured the ozone trends throughout the ozone season. The highest daily average ozone days can  
 285 be seen in late August of 2017 and are strongly correlated with high temperatures. The RFR model was  
 286 also able to reconstruct the ozone peaks (high and low ozone levels). It has done a better job to capture  
 287 the nighttime ozone concentrations, which CMAQ greatly overestimated (Figure S8). The statistical  
 288 summary for CMAQ and RFR model is shown in Table S4. Overall, the RFR model had better statistical  
 289 evaluation metrics (NMB, MB, and MAE) for the 2017 ozone season. Both CMAQ and RFR overestimate  
 290 ozone levels; however, the RFR model has a smaller bias, which ranges from 3.9 ppb to 10 ppb while  
 291 CMAQ outputs' MB ranges from 11 ppb to 22 ppb.

292 *Table S4. Statistical summary of CMAQ and ML for the period from May to September 2017. The*  
 293 *units are in ppm.*

| Month     | NMB   |       | MB (ppm) |         | MAE (ppm) |         |
|-----------|-------|-------|----------|---------|-----------|---------|
|           | CMAQ  | RFR   | CMAQ     | RFR     | CMAQ      | RFR     |
| May       | 0.382 | 0.202 | 0.0111   | 0.00683 | 0.0134    | 0.0077  |
| June      | 0.473 | 0.160 | 0.0161   | 0.00665 | 0.0178    | 0.00987 |
| July      | 0.526 | 0.250 | 0.0175   | 0.0102  | 0.0199    | 0.0129  |
| August    | 0.354 | 0.084 | 0.0136   | 0.00391 | 0.0207    | 0.00870 |
| September | 0.651 | 0.122 | 0.0216   | 0.00489 | 0.0235    | 0.00857 |

294  
 295 Figure S23a and Figure S23b show scatter plots of observation and model for CMAQ simulation  
 296 and RFR model, respectively. The  $R^2$  for CMAQ simulation was 0.58, and most of the data points lie above  
 297 the 1:1 line indicating that ozone concentrations were overestimated. The CMAQ scatter plot's linear  
 298 equation also shows that CMAQ greatly overestimated low ozone concentrations (nighttime ozone). The  
 299 RFR model gave a better performance with the  $R^2$  of 0.85, the slope of 0.98, and the intercept of 7 ppb.  
 300 The small value of intercept and the slope, which is closed to one, specify the good achievement from the  
 301 RFR model, and the data of scatter plot were distributed more evenly around the 1:1 line.

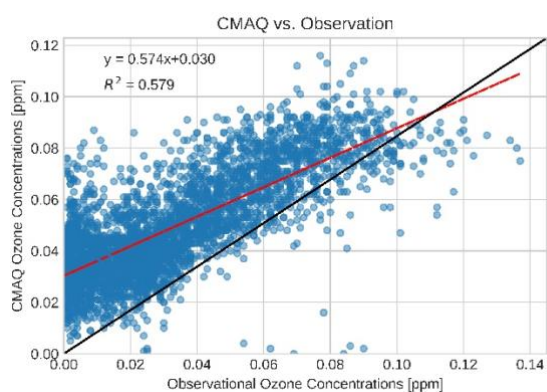

(a)

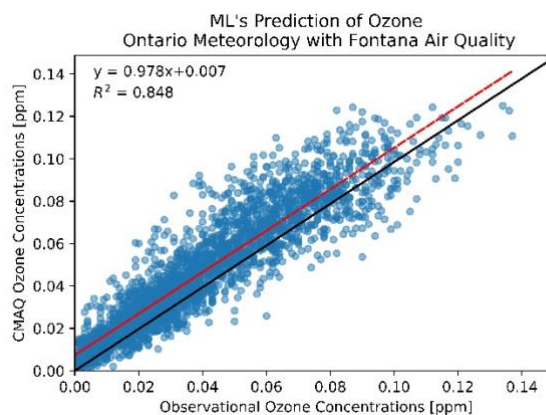

(b)

Figure S23. Scatter plots of CMAQ simulation (a) and RFR predictions (b) for Fontana for 2017 ozone season.

303

#### 304 CMAQ Model Descriptions

305 The second part of our study uses a chemical transport model to provide evaluation data  
 306 from a deterministic model. CMAQ was run in parallel on a dual Xeon workstation with 16  
 307 processing units on an Ubuntu server operating system and compiled with GFortran.  
 308 Meteorological and atmospheric simulations were carried out at 4 km horizontal resolution with  
 309 11 vertical layers over SoCAB. The mechanism configuration used for the 2017 simulation was  
 310 SAPRC07tc\_ae6\_aq (SAPRC07tc photochemical mechanism, aerosol module 6, and aqueous  
 311 chemistry). Gridded 4 km emissions inputs of

312 73 air pollutants were provided by  
313 SCAQMD as daily emission files with  
314 hourly temporal resolution, and emissions  
315 estimates were based on their 2016 Air  
316 Quality Management Plan<sup>1</sup>. At the end of  
317 every simulated day, CMAQ generated  
318 daily NetCDF output files, and those  
319 results were used as inputs for the  
320 following day's initial conditions. CMAQ's  
321 governing processes and the details of  
322 SAPRC-07 may be found in the work of  
323 Byun and Schere and William P.L. Carter,  
324 respectively <sup>2,3</sup>. The boundary conditions  
325 were extracted from a CMAQ simulation  
326 over the U.S from a previous study.<sup>4</sup> The  
327 Weather Research and Forecasting (WRF)  
328 model version 3.9 was used to generate meteorological data. The optimal options for WRF and  
329 the WRF Preprocessing System (WPS) specific to SoCAB are USGS land use, thermal diffusion  
330 surface layer scheme <sup>5</sup>, and Yonsei University planetary boundary layer scheme <sup>6</sup>. We combined  
331 the North American Mesoscale (NAM) Forecast System initialization data with NOAA high-  
332 resolution sea surface temperature (SST) nudging <sup>7</sup> to improve the accuracy of meteorological  
333 inputs for SoCAB. The SCAQMD region, shown in thick black lines, was selected as the target study  
334 area (Figure S24). The finest domain has a horizontal grid resolution of 4 km (Domain 3), fully  
335 covering the SCAQMD region, and the domain consisted of 156 (east west) x 102 (north-south)  
336 grid cells.

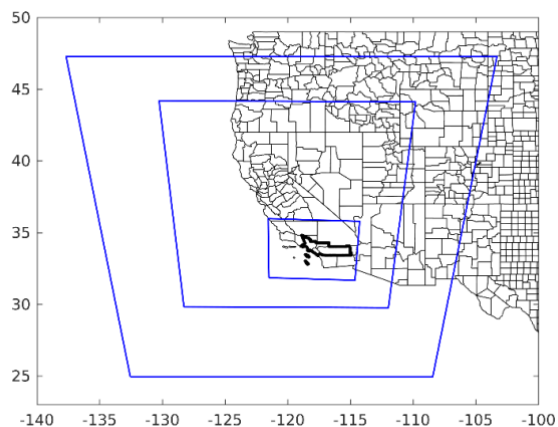

*Figure S24. Nesting of model domains for WRF. The outer most domain has 36 km horizontal resolution, and the first and second inner domains have 12 and 4 km resolution, respectively. The South Coast Air Quality Management District boundary is in bold.*

### 337 CMAQ Evaluation

338 The positive MBs for all evaluation sites suggest the overall overestimates of the model with a  
339 maximum MB of 16 ppb (Fontana) and a minimum of 6 ppb (Crestline and LA). The  
340 overestimation occurred because the model did not capture the low ozone concentrations at

341 night (Figure S8), which significantly increased the CMAQ daily average ozone concentrations.  
 342 Figure S shows the daily average temperature with daily average ozone levels in Fontana. The  
 343 dots and solid line represent observations and model outputs, respectively. Ozone  
 344 concentrations are simulated by CMAQ v5.2 (Figure S25). The temperature profile was well-  
 345 represented by the WRF model in Fontana. The minimum average temperature was 13.1°C for  
 346 WRF model and 11.3°C for observations on May-07, and the maximum was 33.8°C for WRF model  
 347 and 31.1°C for observations on Jul-07. The minimum and maximum temperature days matched  
 348 for the observations and model. Over the period, the model overestimates ozone by a factor of  
 349 1.52. However, the simulated ozone well-captured the historical temporal trends and peaks.  
 350 Ozone trends are shown in Figure S8 for the two months from May-01 to July-01. The model  
 351 matches the observation for the peak ozone of the day; however, it did not represent the lowest  
 352 ozone level resulting in the overall overestimates of the daily average ozone concentrations.  
 353 Simulated ozone exhibited the expected response to the high-temperature days, and the highest  
 354 daily average ozone (0.077 ppm) was obtained on the day with the highest daily average  
 355 temperature.

356 *Table S5. CMAQ benchmarking statistical summary of ozone simulation for nine SCAQMD air*  
 357 *monitoring stations. Units are in ppm.*

| Stations  | Max   | Min   | Mean  | Median | Q1    | Q3    | RMSE  | rRMSE | MAE   | MBE   |
|-----------|-------|-------|-------|--------|-------|-------|-------|-------|-------|-------|
| Anaheim   | 0.107 | 0     | 0.037 | 0.041  | 0.032 | 0.053 | 0.014 | 0.391 | 0.012 | 0.009 |
| Azusa     | 0.114 | 0     | 0.042 | 0.046  | 0.033 | 0.060 | 0.017 | 0.402 | 0.014 | 0.008 |
| Crestline | 0.12  | 0.004 | 0.060 | 0.062  | 0.055 | 0.069 | 0.023 | 0.499 | 0.020 | 0.006 |
| Fontana   | 0.116 | 0     | 0.045 | 0.050  | 0.036 | 0.065 | 0.022 | 0.567 | 0.019 | 0.016 |
| LA        | 0.101 | 0     | 0.033 | 0.037  | 0.023 | 0.051 | 0.015 | 0.757 | 0.013 | 0.006 |
| Pasadena  | 0.111 | 0     | 0.043 | 0.046  | 0.035 | 0.058 | 0.018 | 0.433 | 0.016 | 0.012 |
| Redlands  | 0.108 | 0     | 0.053 | 0.056  | 0.046 | 0.067 | 0.021 | 0.413 | 0.018 | 0.008 |
| Rubidoux  | 0.118 | 0     | 0.045 | 0.049  | 0.035 | 0.065 | 0.018 | 0.762 | 0.015 | 0.009 |
| SB        | 0.119 | 0     | 0.047 | 0.052  | 0.038 | 0.066 | 0.020 | 0.449 | 0.017 | 0.007 |

358

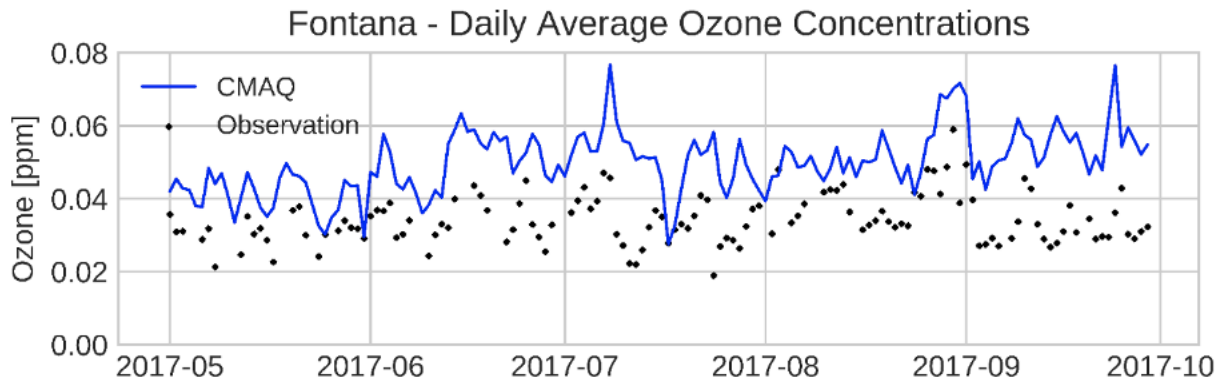

(a)

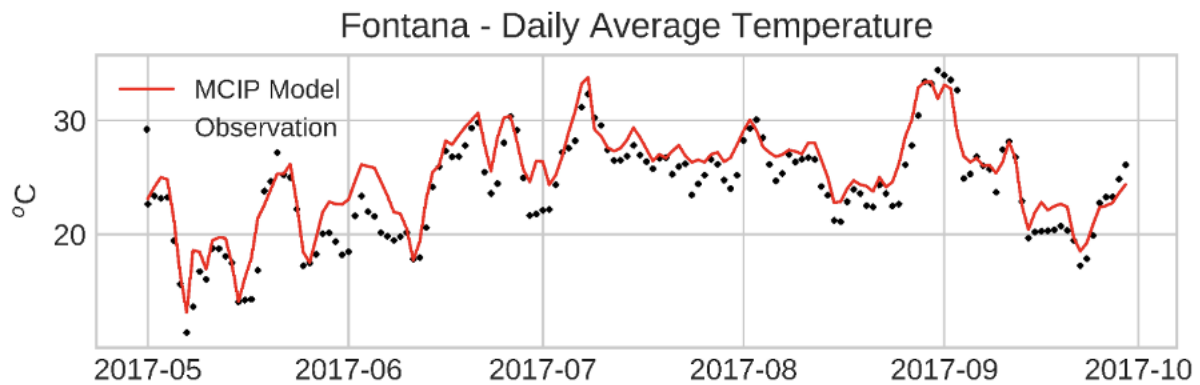

(b)

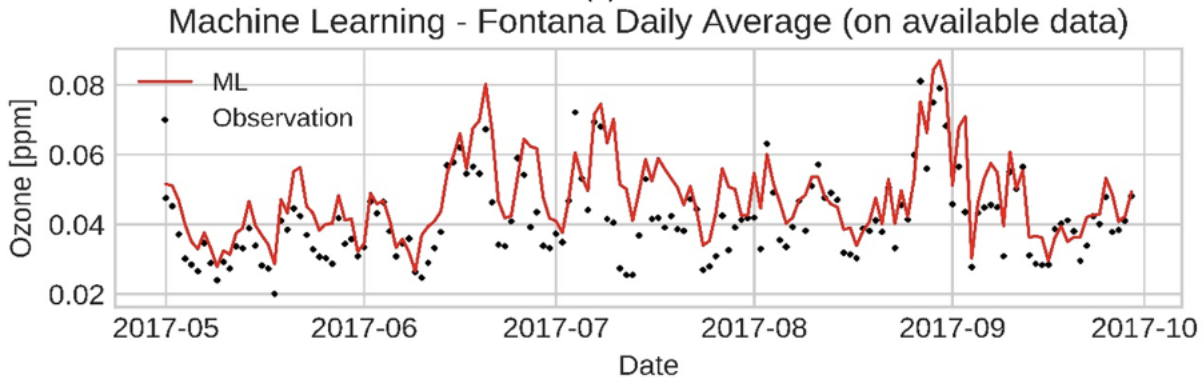

(c)

359

360 *Figure S25. Time series of daily average ozone concentrations (a) of CMAQ outputs (blue line) and*  
 361 *observation (black dots), daily average temperature (b) from WRF (red line) and observation*  
 362 *(black dots), and (c) ML predictions (red line) and observation (black dots) in Fontana, CA. The*  
 363 *Fontana daily average calculation for ML was based on available data, which was not restricted*  
 364 *to twenty-four data points per day. Due to the missing data, the ML outputs were sparser than*  
 365 *the CMAQ outputs. Therefore, the computed daily average observations from hourly data were*  
 366 *the different between (a) and (c).*

367

368 **References**

- 369 (1) South Coast Air Quality Management District. *Final 2016 Air Quality Management Plan*;  
370 2017.
- 371 (2) Carter, W. P. L. Development of the SAPRC-07 Chemical Mechanism. *Atmos. Environ.* **2010**.  
372 <https://doi.org/10.1016/j.atmosenv.2010.01.026>.
- 373 (3) Byun, D.; Schere, K. L. Review of the Governing Equations, Computational Algorithms, and  
374 Other Components of the Models-3 Community Multiscale Air Quality (CMAQ) Modeling  
375 System. *Appl. Mech. Rev.* **2006**. <https://doi.org/10.1115/1.2128636>.
- 376 (4) Skipper, T. N.; Hu, Y.; Odman, M. T.; Henderson, B. H.; Hogrefe, C.; Mathur, R.; Russell, A. G.  
377 Estimating US Background Ozone Using Data Fusion. *Environ. Sci. Technol.* **2021**, *55* (8),  
378 4504–4512. <https://doi.org/10.1021/acs.est.0c08625>.
- 379 (5) Huang, M.; Huang, B.; Huang, A. H. Implementation of 5-Layer Thermal Diffusion Scheme in  
380 Weather Research and Forecasting Model with Intel Many Integrated Cores. In *High-*  
381 *Performance Computing in Remote Sensing IV*; 2014. <https://doi.org/10.1117/12.2069426>.
- 382 (6) Hong, S. Y.; Noh, Y.; Dudhia, J. A New Vertical Diffusion Package with an Explicit Treatment  
383 of Entrainment Processes. *Mon. Weather Rev.* **2006**. <https://doi.org/10.1175/MWR3199.1>.
- 384 (7) Reynolds, R. W.; Smith, T. M.; Liu, C.; Chelton, D. B.; Casey, K. S.; Schlax, M. G. Daily High-  
385 Resolution-Blended Analyses for Sea Surface Temperature. *J. Clim.* **2007**.  
386 <https://doi.org/10.1175/2007JCLI1824.1>.
- 387
